# Supplementary material for: High bycatch rates of manta and devil rays in the “small-scale” artisanal fisheries of Sri Lanka
Source: PeerJ. 2021 Sep 8;9:e11994. doi: 10.7717/peerj.11994 (PMC8434810; doi:10.7717/peerj.11994)
Supplement: Supplemental Information 1 — Mobulid raw data from 2010 to 2020 for Sri Lanka [file peerj-09-11994-s001.xlsx]

## Sheet: Mobulid_Landings_2010-2020
	Date	Market	Species	N
1	2010-05-01	NBO	BIROSTRIS	1
2	2010-11-15	NBO	BIROSTRIS	1
3	2010-11-16	NBO	BIROSTRIS	1
4	2010-11-17	NBO	BIROSTRIS	0
5	2010-11-18	NBO	BIROSTRIS	0
6	2010-11-19	NBO	BIROSTRIS	0
7	2011-01-15	MFH	BIROSTRIS	0
8	2011-01-16	MFH	BIROSTRIS	0
9	2011-02-11	MFH	BIROSTRIS	0
10	2011-05-02	NBO	BIROSTRIS	1
11	2011-05-03	NBO	BIROSTRIS	0
12	2011-05-04	NBO	BIROSTRIS	0
13	2011-05-05	NBO	BIROSTRIS	0
14	2011-05-06	NBO	BIROSTRIS	2
15	2011-05-09	MFH	BIROSTRIS	0
16	2011-05-10	MFH	BIROSTRIS	1
17	2011-05-11	MFH	BIROSTRIS	0
18	2011-05-12	MFH	BIROSTRIS	3
19	2011-05-13	MFH	BIROSTRIS	0
20	2011-05-19	TCO	BIROSTRIS	0
21	2011-05-20	TCO	BIROSTRIS	0
22	2011-05-21	TCO	BIROSTRIS	0
23	2011-05-22	TCO	BIROSTRIS	0
24	2011-05-23	TCO	BIROSTRIS	0
25	2011-05-24	NBO	BIROSTRIS	1
26	2011-05-25	NBO	BIROSTRIS	0
27	2011-05-26	NBO	BIROSTRIS	1
28	2011-05-27	NBO	BIROSTRIS	1
29	2011-05-28	NBO	BIROSTRIS	4
30	2011-06-02	NBO	BIROSTRIS	0
31	2011-06-03	NBO	BIROSTRIS	0
32	2011-06-04	NBO	BIROSTRIS	0
33	2011-06-06	NBO	BIROSTRIS	0
34	2011-06-11	NBO	BIROSTRIS	1
35	2011-06-13	MFH	BIROSTRIS	5
36	2011-06-14	MFH	BIROSTRIS	0
37	2011-06-16	MFH	BIROSTRIS	0
38	2011-06-17	MFH	BIROSTRIS	2
39	2011-06-18	MFH	BIROSTRIS	0
40	2011-06-20	NBO	BIROSTRIS	0
41	2011-06-21	NBO	BIROSTRIS	2
42	2011-06-22	NBO	BIROSTRIS	0
43	2011-06-23	NBO	BIROSTRIS	2
44	2011-06-24	NBO	BIROSTRIS	1
45	2011-06-25	MFH	BIROSTRIS	0
46	2011-06-26	MFH	BIROSTRIS	1
47	2011-06-27	MFH	BIROSTRIS	0
48	2011-06-28	MFH	BIROSTRIS	0
49	2011-06-29	MFH	BIROSTRIS	0
50	2011-07-02	NBO	BIROSTRIS	0
51	2011-07-04	NBO	BIROSTRIS	0
52	2011-07-05	NBO	BIROSTRIS	0
53	2011-07-06	NBO	BIROSTRIS	0
54	2011-07-07	NBO	BIROSTRIS	2
55	2011-07-08	MFH	BIROSTRIS	0
56	2011-07-09	MFH	BIROSTRIS	1
57	2011-07-10	MFH	BIROSTRIS	0
58	2011-07-11	MFH	BIROSTRIS	0
59	2011-07-12	MFH	BIROSTRIS	0
60	2011-07-13	MFH	BIROSTRIS	0
61	2011-07-18	NBO	BIROSTRIS	1
62	2011-07-19	NBO	BIROSTRIS	0
63	2011-07-20	NBO	BIROSTRIS	1
64	2011-07-21	NBO	BIROSTRIS	0
65	2011-07-22	NBO	BIROSTRIS	0
66	2011-07-23	MFH	BIROSTRIS	0
67	2011-07-24	MFH	BIROSTRIS	0
68	2011-07-25	MFH	BIROSTRIS	0
69	2011-07-26	MFH	BIROSTRIS	0
70	2011-07-27	MFH	BIROSTRIS	0
71	2011-08-02	NBO	BIROSTRIS	0
72	2011-08-03	NBO	BIROSTRIS	1
73	2011-08-04	NBO	BIROSTRIS	0
74	2011-08-05	NBO	BIROSTRIS	0
75	2011-08-06	NBO	BIROSTRIS	0
76	2011-08-07	MFH	BIROSTRIS	0
77	2011-08-08	MFH	BIROSTRIS	0
78	2011-08-09	MFH	BIROSTRIS	0
79	2011-08-10	MFH	BIROSTRIS	0
80	2011-08-16	NBO	BIROSTRIS	1
81	2011-08-17	NBO	BIROSTRIS	0
82	2011-08-18	NBO	BIROSTRIS	3
83	2011-08-19	NBO	BIROSTRIS	2
84	2011-08-20	MFH	BIROSTRIS	0
85	2011-08-21	MFH	BIROSTRIS	0
86	2011-08-22	MFH	BIROSTRIS	0
87	2011-08-23	MFH	BIROSTRIS	0
88	2011-08-24	MFH	BIROSTRIS	0
89	2011-08-25	NBO	BIROSTRIS	0
90	2012-03-02	NBO	BIROSTRIS	1
91	2012-03-13	NBO	BIROSTRIS	0
92	2012-03-31	NBO	BIROSTRIS	0
93	2012-04-02	MFH	BIROSTRIS	1
94	2012-05-21	MFH	BIROSTRIS	2
95	2012-05-22	MFH	BIROSTRIS	0
96	2012-05-23	MFH	BIROSTRIS	0
97	2012-05-24	MFH	BIROSTRIS	0
98	2012-05-25	MFH	BIROSTRIS	0
99	2012-05-28	NBO	BIROSTRIS	0
100	2012-05-29	NBO	BIROSTRIS	0
101	2012-05-30	NBO	BIROSTRIS	1
102	2012-05-31	NBO	BIROSTRIS	1
103	2012-06-01	NBO	BIROSTRIS	0
104	2012-06-11	BRW	BIROSTRIS	0
105	2012-06-12	BRW	BIROSTRIS	0
106	2012-06-13	BRW	BIROSTRIS	0
107	2012-06-14	BRW	BIROSTRIS	0
108	2012-06-18	KLP	BIROSTRIS	0
109	2012-06-19	KLP	BIROSTRIS	0
110	2012-06-25	NBO	BIROSTRIS	0
111	2012-06-26	NBO	BIROSTRIS	0
112	2012-06-27	NBO	BIROSTRIS	0
113	2012-07-06	NBO	BIROSTRIS	2
114	2012-07-07	NBO	BIROSTRIS	0
115	2012-07-09	BRW	BIROSTRIS	0
116	2012-07-10	BRW	BIROSTRIS	0
117	2012-07-11	BRW	BIROSTRIS	0
118	2012-07-12	BRW	BIROSTRIS	0
119	2012-07-13	BRW	BIROSTRIS	0
120	2012-08-06	NBO	BIROSTRIS	0
121	2012-08-07	NBO	BIROSTRIS	0
122	2012-08-08	BRW	BIROSTRIS	0
123	2012-08-09	BRW	BIROSTRIS	0
124	2012-08-10	BRW	BIROSTRIS	0
125	2012-08-11	MFH	BIROSTRIS	0
126	2012-08-12	MFH	BIROSTRIS	1
127	2012-08-13	MFH	BIROSTRIS	0
128	2012-08-14	MFH	BIROSTRIS	0
129	2012-08-15	MFH	BIROSTRIS	0
130	2012-08-16	MFH	BIROSTRIS	0
131	2012-08-17	NBO	BIROSTRIS	5
132	2012-08-22	TCO	BIROSTRIS	0
133	2012-08-23	TCO	BIROSTRIS	0
134	2012-08-28	NBO	BIROSTRIS	1
135	2012-12-14	NBO	BIROSTRIS	0
136	2012-12-21	NBO	BIROSTRIS	0
137	2012-12-24	MFH	BIROSTRIS	0
138	2013-03-08	NBO	BIROSTRIS	0
139	2013-03-10	MFH	BIROSTRIS	0
140	2013-03-11	MFH	BIROSTRIS	0
141	2013-03-12	MFH	BIROSTRIS	0
142	2013-04-26	NBO	BIROSTRIS	1
143	2013-04-29	NBO	BIROSTRIS	0
144	2013-04-30	NBO	BIROSTRIS	0
145	2013-05-07	NBO	BIROSTRIS	1
146	2013-05-09	NBO	BIROSTRIS	1
147	2013-05-13	NBO	BIROSTRIS	1
148	2013-05-16	NBO	BIROSTRIS	0
149	2013-05-21	MFH	BIROSTRIS	2
150	2013-05-22	MFH	BIROSTRIS	1
151	2013-06-07	NBO	BIROSTRIS	0
152	2013-06-14	NBO	BIROSTRIS	0
153	2013-06-25	NBO	BIROSTRIS	0
154	2013-07-02	MFH	BIROSTRIS	0
155	2013-07-03	MFH	BIROSTRIS	0
156	2013-07-04	MFH	BIROSTRIS	0
157	2013-08-12	NBO	BIROSTRIS	1
158	2013-08-16	NBO	BIROSTRIS	0
159	2013-11-26	NBO	BIROSTRIS	1
160	2013-11-27	NBO	BIROSTRIS	0
161	2013-11-28	NBO	BIROSTRIS	2
162	2013-12-04	MFH	BIROSTRIS	0
163	2014-01-21	NBO	BIROSTRIS	1
164	2014-01-22	NBO	BIROSTRIS	0
165	2014-01-29	MFH	BIROSTRIS	0
166	2014-01-30	MFH	BIROSTRIS	0
167	2014-02-05	NBO	BIROSTRIS	1
168	2014-02-17	NBO	BIROSTRIS	3
169	2014-02-19	MFH	BIROSTRIS	0
170	2014-02-24	NBO	BIROSTRIS	1
171	2014-02-25	MFH	BIROSTRIS	0
172	2014-03-05	MFH	BIROSTRIS	0
173	2014-03-06	MFH	BIROSTRIS	0
174	2014-03-07	MFH	BIROSTRIS	0
175	2014-03-08	MFH	BIROSTRIS	0
176	2014-03-09	MFH	BIROSTRIS	0
177	2014-03-10	MFH	BIROSTRIS	0
178	2014-03-11	DFH	BIROSTRIS	0
179	2014-03-12	MFH	BIROSTRIS	0
180	2014-03-14	DFH	BIROSTRIS	0
181	2014-03-15	DFH	BIROSTRIS	0
182	2014-03-17	MFH	BIROSTRIS	0
183	2014-03-18	DFH	BIROSTRIS	0
184	2014-03-19	DFH	BIROSTRIS	0
185	2014-03-20	MFH	BIROSTRIS	1
186	2014-03-21	MFH	BIROSTRIS	0
187	2014-03-22	DFH	BIROSTRIS	0
188	2014-03-23	DFH	BIROSTRIS	0
189	2014-03-24	DFH	BIROSTRIS	0
190	2014-03-25	MFH	BIROSTRIS	0
191	2014-03-27	MFH	BIROSTRIS	0
192	2014-03-28	MFH	BIROSTRIS	0
193	2014-03-29	MFH	BIROSTRIS	0
194	2014-03-31	DFH	BIROSTRIS	0
195	2014-04-01	SFH	BIROSTRIS	1
196	2014-04-02	MFH	BIROSTRIS	0
197	2014-04-03	DFH	BIROSTRIS	0
198	2014-04-04	DFH	BIROSTRIS	0
199	2014-04-05	SFH	BIROSTRIS	0
200	2014-04-06	MFH	BIROSTRIS	1
201	2014-04-07	DFH	BIROSTRIS	0
202	2014-04-08	DFH	BIROSTRIS	0
203	2014-04-09	MFH	BIROSTRIS	0
204	2014-04-10	DFH	BIROSTRIS	0
205	2014-04-11	DFH	BIROSTRIS	0
206	2014-04-17	DFH	BIROSTRIS	0
207	2014-04-18	SFH	BIROSTRIS	0
208	2014-04-19	DFH	BIROSTRIS	0
209	2014-04-20	SFH	BIROSTRIS	0
210	2014-04-21	DFH	BIROSTRIS	0
211	2014-04-22	DFH	BIROSTRIS	0
212	2014-04-23	MFH	BIROSTRIS	2
213	2014-04-24	MFH	BIROSTRIS	0
214	2014-04-25	SFH	BIROSTRIS	0
215	2014-04-26	DFH	BIROSTRIS	0
216	2014-04-26	NBO	BIROSTRIS	0
217	2014-04-28	DFH	BIROSTRIS	0
218	2014-04-29	DFH	BIROSTRIS	0
219	2014-05-01	MFH	BIROSTRIS	0
220	2014-05-02	MFH	BIROSTRIS	0
221	2014-05-03	DFH	BIROSTRIS	0
222	2014-05-04	DFH	BIROSTRIS	0
223	2014-05-05	DFH	BIROSTRIS	0
224	2014-05-06	DFH	BIROSTRIS	0
225	2014-05-07	DFH	BIROSTRIS	1
226	2014-05-13	DFH	BIROSTRIS	0
227	2014-05-19	DFH	BIROSTRIS	1
228	2014-05-20	SFH	BIROSTRIS	1
229	2014-05-22	DFH	BIROSTRIS	0
230	2014-05-23	MFH	BIROSTRIS	0
231	2014-05-24	BRW	BIROSTRIS	2
232	2014-05-24	DFH	BIROSTRIS	0
233	2014-05-25	SFH	BIROSTRIS	0
234	2014-05-26	MFH	BIROSTRIS	5
235	2014-05-26	NBO	BIROSTRIS	1
236	2014-05-27	MFH	BIROSTRIS	3
237	2014-05-28	BRW	BIROSTRIS	1
238	2014-05-31	BRW	BIROSTRIS	0
239	2014-06-01	DFH	BIROSTRIS	1
240	2014-06-02	MFH	BIROSTRIS	2
241	2014-06-03	MFH	BIROSTRIS	4
242	2014-06-05	MFH	BIROSTRIS	2
243	2014-06-06	SFH	BIROSTRIS	0
244	2014-06-08	MFH	BIROSTRIS	0
245	2014-06-09	MFH	BIROSTRIS	2
246	2014-06-10	MFH	BIROSTRIS	0
247	2014-06-11	DFH	BIROSTRIS	1
248	2014-06-15	SFH	BIROSTRIS	1
249	2014-06-16	DFH	BIROSTRIS	0
250	2014-06-17	MFH	BIROSTRIS	1
251	2014-06-18	MFH	BIROSTRIS	0
252	2014-06-19	MFH	BIROSTRIS	0
253	2014-06-20	MFH	BIROSTRIS	0
254	2014-06-21	DFH	BIROSTRIS	0
255	2014-06-22	SFH	BIROSTRIS	0
256	2014-06-23	SFH	BIROSTRIS	1
257	2014-06-24	SFH	BIROSTRIS	0
258	2014-06-25	DFH	BIROSTRIS	1
259	2014-06-26	DFH	BIROSTRIS	0
260	2014-06-27	NBO	BIROSTRIS	3
261	2014-06-27	SFH	BIROSTRIS	0
262	2014-06-28	MFH	BIROSTRIS	1
263	2014-07-01	SFH	BIROSTRIS	0
264	2014-07-02	MFH	BIROSTRIS	2
265	2014-07-03	MFH	BIROSTRIS	1
266	2014-07-04	DFH	BIROSTRIS	0
267	2014-07-05	SFH	BIROSTRIS	0
268	2014-07-06	MFH	BIROSTRIS	1
269	2014-07-07	MFH	BIROSTRIS	3
270	2014-07-07	NBO	BIROSTRIS	15
271	2014-07-08	DFH	BIROSTRIS	2
272	2014-07-09	DFH	BIROSTRIS	0
273	2014-07-10	MFH	BIROSTRIS	2
274	2014-07-13	MFH	BIROSTRIS	0
275	2014-07-14	TFH	BIROSTRIS	0
276	2014-07-15	NBO	BIROSTRIS	2
277	2014-07-15	TFH	BIROSTRIS	0
278	2014-07-16	TFH	BIROSTRIS	0
279	2014-07-17	TFH	BIROSTRIS	0
280	2014-07-20	MFH	BIROSTRIS	0
281	2014-07-21	MFH	BIROSTRIS	0
282	2014-07-22	DFH	BIROSTRIS	0
283	2014-07-24	SFH	BIROSTRIS	0
284	2014-07-25	MFH	BIROSTRIS	1
285	2014-07-26	MFH	BIROSTRIS	0
286	2014-07-31	MFH	BIROSTRIS	1
287	2014-08-01	MFH	BIROSTRIS	0
288	2014-08-02	DFH	BIROSTRIS	0
289	2014-08-03	DFH	BIROSTRIS	0
290	2014-08-06	SFH	BIROSTRIS	1
291	2014-08-07	BRW	BIROSTRIS	0
292	2014-08-08	GFH	BIROSTRIS	0
293	2014-08-09	GFH	BIROSTRIS	0
294	2014-08-10	MFH	BIROSTRIS	0
295	2014-08-11	GFH	BIROSTRIS	0
296	2014-08-12	MFH	BIROSTRIS	1
297	2014-08-13	MFH	BIROSTRIS	0
298	2014-08-18	BRW	BIROSTRIS	0
299	2014-08-19	GFH	BIROSTRIS	0
300	2014-08-19	MFH	BIROSTRIS	0
301	2014-08-20	MFH	BIROSTRIS	0
302	2014-08-22	BRW	BIROSTRIS	0
303	2014-08-23	MFH	BIROSTRIS	1
304	2014-08-24	BRW	BIROSTRIS	0
305	2014-09-02	MFH	BIROSTRIS	2
306	2014-09-03	BRW	BIROSTRIS	0
307	2014-09-04	GFH	BIROSTRIS	0
308	2014-09-05	GFH	BIROSTRIS	0
309	2014-09-06	MFH	BIROSTRIS	0
310	2014-09-10	MFH	BIROSTRIS	0
311	2014-09-11	BRW	BIROSTRIS	0
312	2014-09-12	BRW	BIROSTRIS	0
313	2014-09-13	BRW	BIROSTRIS	0
314	2014-09-14	MFH	BIROSTRIS	1
315	2014-09-17	DFH	BIROSTRIS	0
316	2014-09-18	DFH	BIROSTRIS	0
317	2014-09-19	SFH	BIROSTRIS	0
318	2014-09-20	SFH	BIROSTRIS	0
319	2014-09-21	SFH	BIROSTRIS	0
320	2014-09-22	MFH	BIROSTRIS	0
321	2014-09-23	TFH	BIROSTRIS	1
322	2014-09-24	TFH	BIROSTRIS	0
323	2014-09-25	TFH	BIROSTRIS	0
324	2014-09-29	SFH	BIROSTRIS	0
325	2014-09-30	SFH	BIROSTRIS	0
326	2014-10-01	DFH	BIROSTRIS	1
327	2014-10-05	SFH	BIROSTRIS	0
328	2014-10-06	MFH	BIROSTRIS	0
329	2014-10-14	MFH	BIROSTRIS	0
330	2014-10-15	DFH	BIROSTRIS	0
331	2014-10-16	SFH	BIROSTRIS	1
332	2014-10-20	SFH	BIROSTRIS	0
333	2014-10-21	DFH	BIROSTRIS	0
334	2014-10-22	MFH	BIROSTRIS	0
335	2014-10-23	SFH	BIROSTRIS	0
336	2014-10-25	MFH	BIROSTRIS	1
337	2014-10-29	SFH	BIROSTRIS	0
338	2014-10-30	DFH	BIROSTRIS	0
339	2014-11-01	MFH	BIROSTRIS	3
340	2014-11-02	MFH	BIROSTRIS	1
341	2014-11-03	SFH	BIROSTRIS	0
342	2014-11-04	DFH	BIROSTRIS	0
343	2014-11-05	DFH	BIROSTRIS	0
344	2014-11-07	DFH	BIROSTRIS	0
345	2014-11-08	MFH	BIROSTRIS	2
346	2014-11-10	DFH	BIROSTRIS	0
347	2014-11-11	MFH	BIROSTRIS	5
348	2014-11-12	DFH	BIROSTRIS	0
349	2014-11-13	SFH	BIROSTRIS	0
350	2014-11-15	MFH	BIROSTRIS	0
351	2014-11-17	DFH	BIROSTRIS	0
352	2014-11-20	DFH	BIROSTRIS	0
353	2014-11-21	MFH	BIROSTRIS	0
354	2014-11-22	MFH	BIROSTRIS	0
355	2014-11-23	SFH	BIROSTRIS	0
356	2014-11-24	SFH	BIROSTRIS	0
357	2014-11-25	SFH	BIROSTRIS	0
358	2014-11-29	MFH	BIROSTRIS	0
359	2014-12-02	MFH	BIROSTRIS	0
360	2014-12-03	DFH	BIROSTRIS	0
361	2014-12-07	SFH	BIROSTRIS	0
362	2014-12-08	MFH	BIROSTRIS	0
363	2014-12-09	MFH	BIROSTRIS	0
364	2014-12-10	MFH	BIROSTRIS	0
365	2014-12-11	DFH	BIROSTRIS	0
366	2014-12-12	DFH	BIROSTRIS	0
367	2014-12-13	DFH	BIROSTRIS	0
368	2014-12-14	MFH	BIROSTRIS	2
369	2014-12-17	DFH	BIROSTRIS	0
370	2014-12-18	DFH	BIROSTRIS	0
371	2014-12-19	DFH	BIROSTRIS	0
372	2014-12-20	SFH	BIROSTRIS	0
373	2014-12-21	SFH	BIROSTRIS	0
374	2014-12-22	SFH	BIROSTRIS	0
375	2015-01-02	MFH	BIROSTRIS	0
376	2015-01-03	MFH	BIROSTRIS	0
377	2015-01-05	DFH	BIROSTRIS	0
378	2015-01-06	DFH	BIROSTRIS	0
379	2015-01-10	DFH	BIROSTRIS	0
380	2015-01-11	DFH	BIROSTRIS	0
381	2015-01-12	DFH	BIROSTRIS	0
382	2015-01-13	SFH	BIROSTRIS	0
383	2015-01-14	MFH	BIROSTRIS	0
384	2015-01-16	MFH	BIROSTRIS	0
385	2015-01-17	SFH	BIROSTRIS	0
386	2015-01-18	MFH	BIROSTRIS	0
387	2015-01-19	MFH	BIROSTRIS	0
388	2015-01-20	DFH	BIROSTRIS	0
389	2015-01-21	MFH	BIROSTRIS	0
390	2015-01-22	MFH	BIROSTRIS	0
391	2015-01-25	DFH	BIROSTRIS	0
392	2015-01-26	DFH	BIROSTRIS	0
393	2015-01-27	MFH	BIROSTRIS	0
394	2015-01-28	MFH	BIROSTRIS	0
395	2015-01-29	MFH	BIROSTRIS	0
396	2015-01-30	MFH	BIROSTRIS	0
397	2015-01-31	MFH	BIROSTRIS	0
398	2015-02-04	MFH	BIROSTRIS	0
399	2015-02-05	MFH	BIROSTRIS	0
400	2015-02-06	MFH	BIROSTRIS	0
401	2015-02-08	MFH	BIROSTRIS	0
402	2015-02-09	DFH	BIROSTRIS	0
403	2015-02-13	DFH	BIROSTRIS	0
404	2015-02-14	MFH	BIROSTRIS	0
405	2015-02-17	DFH	BIROSTRIS	0
406	2015-02-18	MFH	BIROSTRIS	0
407	2015-02-19	MFH	BIROSTRIS	0
408	2015-02-23	NBO	BIROSTRIS	0
409	2015-12-19	PEL	BIROSTRIS	0
410	2017-03-08	NBO	BIROSTRIS	0
411	2017-03-10	NBO	BIROSTRIS	1
412	2017-04-19	NBO	BIROSTRIS	0
413	2017-05-27	VFH	BIROSTRIS	0
414	2017-05-28	VFM	BIROSTRIS	0
415	2017-05-29	VFM	BIROSTRIS	0
416	2017-05-30	VFM	BIROSTRIS	0
417	2017-06-03	VFM	BIROSTRIS	0
418	2017-06-05	VFH	BIROSTRIS	0
419	2017-08-10	VFH	BIROSTRIS	0
420	2017-08-12	VFH	BIROSTRIS	0
421	2017-08-13	VFM	BIROSTRIS	0
422	2017-08-13	VLS	BIROSTRIS	0
423	2017-08-14	VLS	BIROSTRIS	0
424	2017-08-20	VFH	BIROSTRIS	0
425	2017-08-21	VFM	BIROSTRIS	0
426	2017-08-21	VLS	BIROSTRIS	0
427	2017-08-22	VLS	BIROSTRIS	0
428	2017-08-24	VFM	BIROSTRIS	0
429	2017-08-24	VLS	BIROSTRIS	1
430	2017-08-25	VFH	BIROSTRIS	0
431	2017-08-25	VFM	BIROSTRIS	0
432	2017-09-05	OFM	BIROSTRIS	0
433	2017-09-06	VFH	BIROSTRIS	0
434	2017-09-06	VFM	BIROSTRIS	0
435	2017-09-07	VFM	BIROSTRIS	0
436	2017-09-09	VFH	BIROSTRIS	0
437	2017-09-10	VFH	BIROSTRIS	0
438	2017-09-10	VFM	BIROSTRIS	0
439	2017-09-11	VFH	BIROSTRIS	1
440	2017-09-11	VLS	BIROSTRIS	0
441	2017-09-12	VFH	BIROSTRIS	0
442	2017-09-12	VFM	BIROSTRIS	0
443	2017-09-13	VFH	BIROSTRIS	0
444	2017-09-13	VFM	BIROSTRIS	0
445	2017-09-14	VFH	BIROSTRIS	0
446	2017-09-14	VFM	BIROSTRIS	0
447	2017-09-15	VFH	BIROSTRIS	0
448	2017-09-17	VFH	BIROSTRIS	0
449	2017-09-17	VFM	BIROSTRIS	0
450	2017-09-18	VFH	BIROSTRIS	0
451	2017-09-19	VFH	BIROSTRIS	0
452	2017-09-19	VFM	BIROSTRIS	0
453	2017-09-20	VFH	BIROSTRIS	0
454	2017-09-21	VFH	BIROSTRIS	0
455	2017-09-21	VLS	BIROSTRIS	0
456	2017-09-22	VFH	BIROSTRIS	0
457	2017-09-22	VFM	BIROSTRIS	0
458	2017-09-24	VFH	BIROSTRIS	0
459	2017-09-27	VFH	BIROSTRIS	0
460	2017-09-27	VFM	BIROSTRIS	0
461	2017-09-27	VLS	BIROSTRIS	1
462	2017-09-28	VFH	BIROSTRIS	0
463	2017-09-28	VFM	BIROSTRIS	0
464	2017-09-28	VLS	BIROSTRIS	0
465	2017-09-29	VFH	BIROSTRIS	0
466	2017-09-29	VLS	BIROSTRIS	0
467	2017-10-01	VFH	BIROSTRIS	0
468	2017-10-01	VFM	BIROSTRIS	0
469	2017-10-01	VLS	BIROSTRIS	0
470	2017-10-02	VFH	BIROSTRIS	0
471	2017-10-04	VFH	BIROSTRIS	0
472	2017-10-05	VFH	BIROSTRIS	0
473	2017-10-05	VLS	BIROSTRIS	0
474	2017-10-12	VFH	BIROSTRIS	0
475	2017-10-12	VFM	BIROSTRIS	0
476	2017-10-12	VLS	BIROSTRIS	1
477	2017-10-13	VFH	BIROSTRIS	0
478	2017-10-13	VFM	BIROSTRIS	0
479	2017-10-13	VLS	BIROSTRIS	0
480	2017-10-14	VFH	BIROSTRIS	0
481	2017-10-14	VFM	BIROSTRIS	0
482	2017-10-14	VLS	BIROSTRIS	0
483	2017-10-15	VFH	BIROSTRIS	0
484	2017-10-15	VFM	BIROSTRIS	0
485	2017-10-15	VLS	BIROSTRIS	0
486	2017-10-16	VFM	BIROSTRIS	0
487	2017-10-16	VLS	BIROSTRIS	0
488	2017-10-19	NBO	BIROSTRIS	0
489	2017-10-19	VFH	BIROSTRIS	0
490	2017-10-19	VFM	BIROSTRIS	0
491	2017-10-19	VLS	BIROSTRIS	0
492	2017-10-20	NBO	BIROSTRIS	0
493	2017-10-20	VFH	BIROSTRIS	0
494	2017-10-22	VFH	BIROSTRIS	0
495	2017-11-01	VFH	BIROSTRIS	0
496	2017-11-01	VFM	BIROSTRIS	0
497	2017-11-02	VFH	BIROSTRIS	0
498	2017-11-03	VLS	BIROSTRIS	0
499	2017-11-04	VFH	BIROSTRIS	0
500	2017-11-11	NBO	BIROSTRIS	0
501	2017-11-17	VFH	BIROSTRIS	0
502	2017-11-26	JFN	BIROSTRIS	0
503	2017-11-29	JFN	BIROSTRIS	0
504	2017-12-06	JFN	BIROSTRIS	0
505	2017-12-07	JFN	BIROSTRIS	0
506	2017-12-07	TFH	BIROSTRIS	0
507	2017-12-08	TFH	BIROSTRIS	0
508	2017-12-09	JPP	BIROSTRIS	0
509	2017-12-11	TFH	BIROSTRIS	0
510	2017-12-12	TFH	BIROSTRIS	0
511	2017-12-13	JFN	BIROSTRIS	0
512	2017-12-13	TFH	BIROSTRIS	0
513	2017-12-14	JFN	BIROSTRIS	0
514	2017-12-14	TFH	BIROSTRIS	0
515	2017-12-15	TFH	BIROSTRIS	0
516	2017-12-16	JPP	BIROSTRIS	0
517	2017-12-18	TFH	BIROSTRIS	0
518	2017-12-19	TFH	BIROSTRIS	0
519	2017-12-20	TFH	BIROSTRIS	0
520	2017-12-21	TFH	BIROSTRIS	0
521	2017-12-22	TFH	BIROSTRIS	0
522	2017-12-23	JPP	BIROSTRIS	0
523	2017-12-25	TFH	BIROSTRIS	0
524	2017-12-26	TFH	BIROSTRIS	0
525	2017-12-27	TFH	BIROSTRIS	0
526	2017-12-28	TFH	BIROSTRIS	0
527	2017-12-30	JPP	BIROSTRIS	0
528	2018-01-04	JFN	BIROSTRIS	0
529	2018-01-05	TFH	BIROSTRIS	0
530	2018-01-06	JPP	BIROSTRIS	0
531	2018-01-07	JFN	BIROSTRIS	0
532	2018-01-08	NBO	BIROSTRIS	0
533	2018-01-08	TFH	BIROSTRIS	0
534	2018-01-09	TFH	BIROSTRIS	0
535	2018-01-10	TFH	BIROSTRIS	0
536	2018-01-11	TFH	BIROSTRIS	0
537	2018-01-16	TFH	BIROSTRIS	0
538	2018-01-17	JFN	BIROSTRIS	0
539	2018-01-17	TFH	BIROSTRIS	0
540	2018-01-18	JFN	BIROSTRIS	0
541	2018-01-18	TFH	BIROSTRIS	0
542	2018-01-19	TFH	BIROSTRIS	0
543	2018-01-24	JFN	BIROSTRIS	0
544	2018-01-25	JFN	BIROSTRIS	0
545	2018-01-27	JPP	BIROSTRIS	0
546	2018-01-31	JFN	BIROSTRIS	0
547	2018-02-03	VFH	BIROSTRIS	0
548	2018-02-03	VFM	BIROSTRIS	0
549	2018-02-03	VLS	BIROSTRIS	0
550	2018-02-04	VFH	BIROSTRIS	0
551	2018-02-05	VFH	BIROSTRIS	0
552	2018-02-06	VFH	BIROSTRIS	0
553	2018-02-06	VLS	BIROSTRIS	0
554	2018-02-07	VLS	BIROSTRIS	1
555	2018-02-09	VLS	BIROSTRIS	0
556	2018-02-12	VFH	BIROSTRIS	0
557	2018-02-12	VFM	BIROSTRIS	0
558	2018-02-13	VFH	BIROSTRIS	0
559	2018-02-15	VFM	BIROSTRIS	0
560	2018-02-15	VLS	BIROSTRIS	0
561	2018-02-16	VLS	BIROSTRIS	0
562	2018-02-21	JFN	BIROSTRIS	0
563	2018-02-28	JFN	BIROSTRIS	0
564	2018-03-01	JFN	BIROSTRIS	0
565	2018-03-01	JPP	BIROSTRIS	0
566	2018-03-03	JPP	BIROSTRIS	0
567	2018-03-03	NBO	BIROSTRIS	0
568	2018-03-08	KLP	BIROSTRIS	0
569	2018-03-09	PTM	BIROSTRIS	0
570	2018-03-10	JPP	BIROSTRIS	0
571	2018-03-11	JFN	BIROSTRIS	0
572	2018-03-11	JPP	BIROSTRIS	0
573	2018-03-12	JFN	BIROSTRIS	0
574	2018-03-12	JPP	BIROSTRIS	0
575	2018-03-13	MNR	BIROSTRIS	0
576	2018-03-14	MUT	BIROSTRIS	0
577	2018-03-15	MUT	BIROSTRIS	0
578	2018-03-16	VFH	BIROSTRIS	0
579	2018-03-16	VLS	BIROSTRIS	0
580	2018-03-20	VFH	BIROSTRIS	0
581	2018-03-20	VFM	BIROSTRIS	0
582	2018-03-21	MUT	BIROSTRIS	0
583	2018-03-21	VFH	BIROSTRIS	0
584	2018-03-21	VFM	BIROSTRIS	0
585	2018-03-22	MUT	BIROSTRIS	0
586	2018-03-22	VFM	BIROSTRIS	0
587	2018-03-22	VLS	BIROSTRIS	0
588	2018-03-26	JPP	BIROSTRIS	0
589	2018-03-27	JPP	BIROSTRIS	0
590	2018-03-28	JFN	BIROSTRIS	0
591	2018-03-29	JFN	BIROSTRIS	0
592	2018-04-02	JFN	BIROSTRIS	0
593	2018-04-03	JFN	BIROSTRIS	0
594	2018-04-03	VLS	BIROSTRIS	0
595	2018-04-04	JPP	BIROSTRIS	0
596	2018-04-05	VFM	BIROSTRIS	0
597	2018-04-05	VLS	BIROSTRIS	1
598	2018-04-06	JPP	BIROSTRIS	0
599	2018-04-07	JIS	BIROSTRIS	0
600	2018-04-08	JPP	BIROSTRIS	0
601	2018-04-08	VFH	BIROSTRIS	0
602	2018-04-08	VFM	BIROSTRIS	0
603	2018-04-09	JFN	BIROSTRIS	0
604	2018-04-10	JPP	BIROSTRIS	0
605	2018-04-11	JFN	BIROSTRIS	0
606	2018-04-11	VLS	BIROSTRIS	0
607	2018-04-12	JFN	BIROSTRIS	0
608	2018-04-12	VFH	BIROSTRIS	0
609	2018-04-12	VLS	BIROSTRIS	1
610	2018-04-13	VFH	BIROSTRIS	0
611	2018-04-16	VFH	BIROSTRIS	0
612	2018-04-16	VLS	BIROSTRIS	0
613	2018-04-17	VFH	BIROSTRIS	0
614	2018-04-17	VFM	BIROSTRIS	0
615	2018-04-17	VLS	BIROSTRIS	0
616	2018-04-18	JPP	BIROSTRIS	0
617	2018-04-18	VFM	BIROSTRIS	0
618	2018-04-18	VLS	BIROSTRIS	1
619	2018-04-19	JFN	BIROSTRIS	0
620	2018-04-20	JPP	BIROSTRIS	0
621	2018-04-20	VFH	BIROSTRIS	0
622	2018-04-20	VFM	BIROSTRIS	0
623	2018-04-21	JFN	BIROSTRIS	0
624	2018-04-22	JFN	BIROSTRIS	0
625	2018-04-22	VFM	BIROSTRIS	0
626	2018-04-24	JFN	BIROSTRIS	0
627	2018-04-24	VFH	BIROSTRIS	0
628	2018-04-25	JFN	BIROSTRIS	0
629	2018-04-26	JFN	BIROSTRIS	0
630	2018-04-28	JPP	BIROSTRIS	0
631	2018-04-30	JFN	BIROSTRIS	0
632	2018-05-03	VFH	BIROSTRIS	0
633	2018-05-03	VFM	BIROSTRIS	0
634	2018-05-03	VLS	BIROSTRIS	0
635	2018-05-04	VFH	BIROSTRIS	0
636	2018-05-05	VFH	BIROSTRIS	0
637	2018-05-05	VLS	BIROSTRIS	0
638	2018-05-06	VFH	BIROSTRIS	0
639	2018-05-06	VFM	BIROSTRIS	0
640	2018-05-07	VFH	BIROSTRIS	0
641	2018-05-07	VFM	BIROSTRIS	0
642	2018-05-07	VLS	BIROSTRIS	1
643	2018-05-08	VFH	BIROSTRIS	0
644	2018-05-09	JPP	BIROSTRIS	0
645	2018-05-09	VFH	BIROSTRIS	1
646	2018-05-10	JFN	BIROSTRIS	0
647	2018-05-10	VFH	BIROSTRIS	0
648	2018-05-12	VFH	BIROSTRIS	0
649	2018-05-12	VLS	BIROSTRIS	0
650	2018-05-13	VFH	BIROSTRIS	0
651	2018-05-13	VFM	BIROSTRIS	0
652	2018-05-14	NBO	BIROSTRIS	0
653	2018-05-15	NBO	BIROSTRIS	1
654	2018-05-16	NBO	BIROSTRIS	0
655	2018-05-17	NBO	BIROSTRIS	0
656	2018-05-17	VFH	BIROSTRIS	0
657	2018-05-17	VFM	BIROSTRIS	0
658	2018-05-17	VLS	BIROSTRIS	1
659	2018-05-18	NBO	BIROSTRIS	1
660	2018-05-19	NBO	BIROSTRIS	1
661	2018-05-19	VFH	BIROSTRIS	0
662	2018-05-19	VFM	BIROSTRIS	0
663	2018-05-19	VLS	BIROSTRIS	0
664	2018-05-21	BRW	BIROSTRIS	0
665	2018-05-21	VLS	BIROSTRIS	0
666	2018-05-22	BRW	BIROSTRIS	1
667	2018-05-22	VFH	BIROSTRIS	0
668	2018-05-22	VLS	BIROSTRIS	0
669	2018-05-23	BRW	BIROSTRIS	1
670	2018-05-23	VFH	BIROSTRIS	0
671	2018-05-24	BRW	BIROSTRIS	0
672	2018-05-24	VFH	BIROSTRIS	0
673	2018-05-25	BRW	BIROSTRIS	0
674	2018-05-26	BRW	BIROSTRIS	1
675	2018-05-30	VFH	BIROSTRIS	0
676	2018-05-30	VFM	BIROSTRIS	0
677	2018-06-02	VLS	BIROSTRIS	0
678	2018-06-03	VLS	BIROSTRIS	0
679	2018-06-04	VLS	BIROSTRIS	0
680	2018-06-13	JPP	BIROSTRIS	0
681	2018-07-04	VFH	BIROSTRIS	0
682	2018-07-05	JFN	BIROSTRIS	0
683	2018-07-05	VFH	BIROSTRIS	0
684	2018-07-05	VLS	BIROSTRIS	0
685	2018-07-06	JFN	BIROSTRIS	0
686	2018-07-06	VFH	BIROSTRIS	0
687	2018-07-07	JFN	BIROSTRIS	0
688	2018-07-07	VLS	BIROSTRIS	0
689	2018-07-08	JFN	BIROSTRIS	0
690	2018-07-08	VFM	BIROSTRIS	0
691	2018-07-09	JPP	BIROSTRIS	0
692	2018-07-10	JPP	BIROSTRIS	0
693	2018-07-11	VLS	BIROSTRIS	1
694	2018-07-12	VLS	BIROSTRIS	0
695	2018-07-15	VFH	BIROSTRIS	0
696	2018-07-15	VFM	BIROSTRIS	0
697	2018-07-16	VFH	BIROSTRIS	0
698	2018-07-16	VFM	BIROSTRIS	0
699	2018-07-17	JPP	BIROSTRIS	0
700	2018-07-17	VFH	BIROSTRIS	0
701	2018-07-17	VFM	BIROSTRIS	0
702	2018-07-18	JFN	BIROSTRIS	0
703	2018-07-18	VFH	BIROSTRIS	0
704	2018-07-18	VFM	BIROSTRIS	0
705	2018-07-19	JFN	BIROSTRIS	0
706	2018-07-19	VFM	BIROSTRIS	0
707	2018-07-19	VLS	BIROSTRIS	0
708	2018-07-20	JFN	BIROSTRIS	0
709	2018-07-20	VFH	BIROSTRIS	0
710	2018-07-20	VLS	BIROSTRIS	0
711	2018-07-21	JFN	BIROSTRIS	0
712	2018-07-23	JFN	BIROSTRIS	0
713	2018-07-25	MLT	BIROSTRIS	0
714	2018-07-26	MLT	BIROSTRIS	0
715	2018-07-29	JFN	BIROSTRIS	0
716	2018-07-30	JIS	BIROSTRIS	0
717	2018-07-31	JIS	BIROSTRIS	0
718	2018-08-01	CFM	BIROSTRIS	0
719	2018-08-01	JPP	BIROSTRIS	0
720	2018-08-02	CFM	BIROSTRIS	0
721	2018-08-02	JFN	BIROSTRIS	0
722	2018-08-03	CFM	BIROSTRIS	0
723	2018-08-03	KYK	BIROSTRIS	0
724	2018-08-04	JFN	BIROSTRIS	0
725	2018-08-05	JFN	BIROSTRIS	0
726	2018-08-06	JPP	BIROSTRIS	0
727	2018-08-07	CFM	BIROSTRIS	0
728	2018-08-07	JFN	BIROSTRIS	0
729	2018-08-07	VFH	BIROSTRIS	0
730	2018-08-07	VFM	BIROSTRIS	0
731	2018-08-08	CFM	BIROSTRIS	0
732	2018-08-08	VFM	BIROSTRIS	0
733	2018-08-09	CFM	BIROSTRIS	0
734	2018-08-09	JFN	BIROSTRIS	0
735	2018-08-09	VLS	BIROSTRIS	0
736	2018-08-10	CFM	BIROSTRIS	0
737	2018-08-10	JPP	BIROSTRIS	0
738	2018-08-10	VLS	BIROSTRIS	0
739	2018-08-11	CFM	BIROSTRIS	0
740	2018-08-11	JPP	BIROSTRIS	0
741	2018-08-13	JFN	BIROSTRIS	0
742	2018-08-13	VFH	BIROSTRIS	0
743	2018-08-14	MLT	BIROSTRIS	0
744	2018-08-14	PEL	BIROSTRIS	0
745	2018-08-14	VFH	BIROSTRIS	0
746	2018-08-15	MLT	BIROSTRIS	0
747	2018-08-16	PEL	BIROSTRIS	0
748	2018-08-18	VFH	BIROSTRIS	0
749	2018-08-18	VLS	BIROSTRIS	0
750	2018-08-20	VFH	BIROSTRIS	0
751	2018-08-20	VFM	BIROSTRIS	0
752	2018-08-21	VFH	BIROSTRIS	0
753	2018-08-21	VFM	BIROSTRIS	0
754	2018-08-22	JFN	BIROSTRIS	0
755	2018-08-22	VFH	BIROSTRIS	0
756	2018-08-22	VFM	BIROSTRIS	0
757	2018-08-23	JPP	BIROSTRIS	0
758	2018-08-23	VFH	BIROSTRIS	0
759	2018-08-23	VFM	BIROSTRIS	0
760	2018-08-23	VLS	BIROSTRIS	0
761	2018-08-24	JFN	BIROSTRIS	0
762	2018-08-24	VFH	BIROSTRIS	0
763	2018-08-24	VFM	BIROSTRIS	0
764	2018-08-24	VLS	BIROSTRIS	0
765	2018-08-25	JFN	BIROSTRIS	0
766	2018-08-26	JPP	BIROSTRIS	0
767	2018-08-28	CFM	BIROSTRIS	0
768	2018-08-28	KLP	BIROSTRIS	0
769	2018-08-28	KYK	BIROSTRIS	0
770	2018-08-29	CFM	BIROSTRIS	0
771	2018-08-29	KLP	BIROSTRIS	0
772	2018-08-30	CFM	BIROSTRIS	0
773	2018-08-31	CFM	BIROSTRIS	0
774	2018-08-31	JFN	BIROSTRIS	0
775	2018-08-31	VFH	BIROSTRIS	0
776	2018-08-31	VLS	BIROSTRIS	0
777	2018-09-03	JFN	BIROSTRIS	0
778	2018-09-03	VFH	BIROSTRIS	0
779	2018-09-03	VFM	BIROSTRIS	0
780	2018-09-04	JFN	BIROSTRIS	0
781	2018-09-04	VFH	BIROSTRIS	0
782	2018-09-06	JFN	BIROSTRIS	0
783	2018-09-06	PAS	BIROSTRIS	0
784	2018-09-07	JPP	BIROSTRIS	0
785	2018-09-08	JFN	BIROSTRIS	0
786	2018-09-09	JFN	BIROSTRIS	0
787	2018-09-10	JPP	BIROSTRIS	0
788	2018-09-11	JPP	BIROSTRIS	0
789	2018-09-11	MFL	BIROSTRIS	0
790	2018-09-12	MFL	BIROSTRIS	0
791	2018-09-13	CFM	BIROSTRIS	0
792	2018-09-13	JFN	BIROSTRIS	0
793	2018-09-14	CFM	BIROSTRIS	0
794	2018-09-14	JFN	BIROSTRIS	0
795	2018-09-18	JIS	BIROSTRIS	0
796	2018-09-18	KFH	BIROSTRIS	0
797	2018-09-19	JPP	BIROSTRIS	0
798	2018-09-19	KFH	BIROSTRIS	0
799	2018-09-20	JPP	BIROSTRIS	0
800	2018-09-21	VLS	BIROSTRIS	0
801	2018-09-22	JFN	BIROSTRIS	0
802	2018-09-23	JFN	BIROSTRIS	0
803	2018-09-24	JIS	BIROSTRIS	0
804	2018-09-25	JFN	BIROSTRIS	0
805	2018-09-26	DLS	BIROSTRIS	0
806	2018-09-26	KFH	BIROSTRIS	0
807	2018-09-26	MLT	BIROSTRIS	0
808	2018-09-27	DLS	BIROSTRIS	0
809	2018-09-27	MLT	BIROSTRIS	0
810	2018-09-28	DLS	BIROSTRIS	0
811	2018-09-28	KFH	BIROSTRIS	0
812	2018-09-28	KYK	BIROSTRIS	0
813	2018-09-29	DLS	BIROSTRIS	0
814	2018-09-30	KFH	BIROSTRIS	0
815	2018-10-01	DLS	BIROSTRIS	0
816	2018-10-01	JFN	BIROSTRIS	0
817	2018-10-01	KFH	BIROSTRIS	0
818	2018-10-02	DLS	BIROSTRIS	0
819	2018-10-02	JFN	BIROSTRIS	0
820	2018-10-02	KFH	BIROSTRIS	0
821	2018-10-03	DLS	BIROSTRIS	0
822	2018-10-03	JPP	BIROSTRIS	0
823	2018-10-03	KFH	BIROSTRIS	0
824	2018-10-03	VFM	BIROSTRIS	0
825	2018-10-04	DLS	BIROSTRIS	0
826	2018-10-04	KFH	BIROSTRIS	0
827	2018-10-06	DLS	BIROSTRIS	0
828	2018-10-06	KFH	BIROSTRIS	0
829	2018-10-07	JFN	BIROSTRIS	0
830	2018-10-07	KFH	BIROSTRIS	0
831	2018-10-08	DLS	BIROSTRIS	0
832	2018-10-08	JPP	BIROSTRIS	0
833	2018-10-08	KFH	BIROSTRIS	0
834	2018-10-09	JPP	BIROSTRIS	0
835	2018-10-09	KFH	BIROSTRIS	0
836	2018-10-10	DLS	BIROSTRIS	0
837	2018-10-10	JPP	BIROSTRIS	0
838	2018-10-10	KYK	BIROSTRIS	0
839	2018-10-11	DLS	BIROSTRIS	0
840	2018-10-11	KFH	BIROSTRIS	0
841	2018-10-11	VFM	BIROSTRIS	0
842	2018-10-11	VLS	BIROSTRIS	0
843	2018-10-12	JFN	BIROSTRIS	0
844	2018-10-12	MFH	BIROSTRIS	0
845	2018-10-12	VFM	BIROSTRIS	0
846	2018-10-12	VLS	BIROSTRIS	2
847	2018-10-13	JFN	BIROSTRIS	0
848	2018-10-13	MFH	BIROSTRIS	0
849	2018-10-14	JFN	BIROSTRIS	0
850	2018-10-14	MFH	BIROSTRIS	0
851	2018-10-16	MFH	BIROSTRIS	0
852	2018-10-16	MNR	BIROSTRIS	0
853	2018-10-17	MFH	BIROSTRIS	0
854	2018-10-17	MNR	BIROSTRIS	0
855	2018-10-18	KYK	BIROSTRIS	0
856	2018-10-18	MFH	BIROSTRIS	0
857	2018-10-18	MNR	BIROSTRIS	0
858	2018-10-19	MFH	BIROSTRIS	4
859	2018-10-20	MFH	BIROSTRIS	0
860	2018-10-21	MFH	BIROSTRIS	2
861	2018-10-22	MFH	BIROSTRIS	0
862	2018-10-23	JFN	BIROSTRIS	0
863	2018-10-23	MFH	BIROSTRIS	0
864	2018-10-24	JFN	BIROSTRIS	0
865	2018-10-24	VFM	BIROSTRIS	0
866	2018-10-24	VLS	BIROSTRIS	1
867	2018-10-25	MFH	BIROSTRIS	0
868	2018-10-25	MWG	BIROSTRIS	0
869	2018-10-25	VLS	BIROSTRIS	0
870	2018-10-26	JFN	BIROSTRIS	0
871	2018-10-28	JFN	BIROSTRIS	0
872	2018-10-29	JFN	BIROSTRIS	0
873	2018-11-01	CFM	BIROSTRIS	0
874	2018-11-02	CFM	BIROSTRIS	0
875	2018-11-03	CFM	BIROSTRIS	0
876	2018-11-05	CFM	BIROSTRIS	0
877	2018-11-06	CFM	BIROSTRIS	0
878	2018-11-07	CFM	BIROSTRIS	0
879	2018-11-08	CFM	BIROSTRIS	0
880	2018-11-08	VLS	BIROSTRIS	0
881	2018-11-09	CFM	BIROSTRIS	0
882	2018-11-10	CFM	BIROSTRIS	0
883	2018-11-12	KYK	BIROSTRIS	0
884	2018-11-17	KYK	BIROSTRIS	0
885	2018-11-21	VFM	BIROSTRIS	0
886	2018-11-21	VLS	BIROSTRIS	0
887	2018-11-22	VLS	BIROSTRIS	0
888	2018-11-25	MFH	BIROSTRIS	1
889	2018-11-28	KYK	BIROSTRIS	0
890	2018-11-28	VFM	BIROSTRIS	0
891	2018-11-28	VLS	BIROSTRIS	0
892	2018-11-29	VFH	BIROSTRIS	1
893	2018-11-29	VLS	BIROSTRIS	1
894	2018-11-30	VLS	BIROSTRIS	0
895	2018-12-01	KYK	BIROSTRIS	0
896	2018-12-01	VLS	BIROSTRIS	0
897	2018-12-05	KLP	BIROSTRIS	0
898	2018-12-28	JPP	BIROSTRIS	0
899	2018-12-30	JFN	BIROSTRIS	0
900	2019-01-03	KYK	BIROSTRIS	0
901	2019-01-05	KYK	BIROSTRIS	0
902	2019-01-12	KYK	BIROSTRIS	0
903	2019-01-20	JFN	BIROSTRIS	0
904	2019-01-22	JPP	BIROSTRIS	0
905	2019-01-25	JMA	BIROSTRIS	0
906	2019-02-09	VFH	BIROSTRIS	2
907	2019-02-09	VFM	BIROSTRIS	0
908	2019-02-12	PUK	BIROSTRIS	0
909	2019-02-12	VFH	BIROSTRIS	0
910	2019-02-12	VLS	BIROSTRIS	1
911	2019-02-13	VFH	BIROSTRIS	2
912	2019-02-14	VFM	BIROSTRIS	0
913	2019-02-14	VLS	BIROSTRIS	1
914	2019-02-16	VFH	BIROSTRIS	0
915	2019-02-16	VFM	BIROSTRIS	0
916	2019-02-17	VFH	BIROSTRIS	0
917	2019-02-17	VFM	BIROSTRIS	0
918	2019-02-19	VFH	BIROSTRIS	0
919	2019-02-19	VFM	BIROSTRIS	0
920	2019-02-22	VLS	BIROSTRIS	0
921	2019-02-23	VFH	BIROSTRIS	0
922	2019-02-23	VFM	BIROSTRIS	0
923	2019-02-24	VFM	BIROSTRIS	0
924	2019-02-26	VFH	BIROSTRIS	0
925	2019-02-26	VFM	BIROSTRIS	0
926	2019-02-27	VFM	BIROSTRIS	0
927	2019-02-27	VLS	BIROSTRIS	0
928	2019-03-01	VFH	BIROSTRIS	1
929	2019-03-03	VFH	BIROSTRIS	0
930	2019-03-03	VFM	BIROSTRIS	0
931	2019-03-05	TFH	BIROSTRIS	0
932	2019-03-07	TFH	BIROSTRIS	0
933	2019-03-11	KBG	BIROSTRIS	0
934	2019-03-12	KBG	BIROSTRIS	0
935	2019-03-13	KBG	BIROSTRIS	0
936	2019-03-14	KBG	BIROSTRIS	0
937	2019-03-15	KBG	BIROSTRIS	0
938	2019-03-18	TFH	BIROSTRIS	0
939	2019-03-18	VFH	BIROSTRIS	0
940	2019-03-19	TFH	BIROSTRIS	0
941	2019-03-19	VFM	BIROSTRIS	0
942	2019-03-19	VLS	BIROSTRIS	0
943	2019-03-20	VFM	BIROSTRIS	0
944	2019-03-21	VFH	BIROSTRIS	0
945	2019-03-22	JPP	BIROSTRIS	0
946	2019-03-22	VFH	BIROSTRIS	0
947	2019-03-22	VFM	BIROSTRIS	0
948	2019-03-23	VFH	BIROSTRIS	0
949	2019-03-24	VFH	BIROSTRIS	0
950	2019-03-25	VFH	BIROSTRIS	0
951	2019-03-25	VFM	BIROSTRIS	0
952	2019-03-26	VFH	BIROSTRIS	0
953	2019-03-27	VFH	BIROSTRIS	0
954	2019-03-27	VFM	BIROSTRIS	0
955	2019-03-27	VLS	BIROSTRIS	1
956	2019-03-28	VFH	BIROSTRIS	0
957	2019-03-28	VFM	BIROSTRIS	0
958	2019-03-28	VLS	BIROSTRIS	3
959	2019-04-01	PUK	BIROSTRIS	0
960	2019-04-02	PUK	BIROSTRIS	0
961	2019-04-03	PUK	BIROSTRIS	0
962	2019-04-04	PUK	BIROSTRIS	0
963	2019-04-05	PUK	BIROSTRIS	0
964	2019-04-07	VFH	BIROSTRIS	0
965	2019-04-08	VFM	BIROSTRIS	0
966	2019-04-10	VFM	BIROSTRIS	0
967	2019-04-10	VLS	BIROSTRIS	0
968	2019-04-11	VFH	BIROSTRIS	0
969	2019-04-11	VFM	BIROSTRIS	0
970	2019-04-11	VLS	BIROSTRIS	2
971	2019-04-17	VFH	BIROSTRIS	2
972	2019-04-17	VFM	BIROSTRIS	0
973	2019-04-18	VFM	BIROSTRIS	0
974	2019-04-18	VLS	BIROSTRIS	0
975	2019-05-09	JPP	BIROSTRIS	0
976	2019-05-10	DLS	BIROSTRIS	0
977	2019-05-11	DLS	BIROSTRIS	0
978	2019-05-11	JMA	BIROSTRIS	0
979	2019-05-12	JFN	BIROSTRIS	0
980	2019-05-13	JMA	BIROSTRIS	0
981	2019-05-13	KFH	BIROSTRIS	0
982	2019-05-14	JPP	BIROSTRIS	0
983	2019-05-14	KFH	BIROSTRIS	0
984	2019-05-15	JFN	BIROSTRIS	0
985	2019-05-15	KFH	BIROSTRIS	0
986	2019-05-16	JFN	BIROSTRIS	0
987	2019-05-16	JMA	BIROSTRIS	0
988	2019-05-16	KFH	BIROSTRIS	0
989	2019-05-17	KFH	BIROSTRIS	0
990	2019-05-20	KFH	BIROSTRIS	1
991	2019-05-21	JMA	BIROSTRIS	0
992	2019-05-21	KFH	BIROSTRIS	0
993	2019-05-22	JFN	BIROSTRIS	0
994	2019-05-23	JFN	BIROSTRIS	0
995	2019-05-24	JFN	BIROSTRIS	0
996	2019-05-25	JMA	BIROSTRIS	0
997	2019-05-26	JPP	BIROSTRIS	0
998	2019-05-29	JMA	BIROSTRIS	0
999	2019-06-01	JMA	BIROSTRIS	0
1000	2019-06-02	JFN	BIROSTRIS	0
1001	2019-06-03	JFN	BIROSTRIS	0
1002	2019-06-04	CDL	BIROSTRIS	0
1003	2019-06-04	JPP	BIROSTRIS	0
1004	2019-06-05	CDL	BIROSTRIS	0
1005	2019-06-05	MLT	BIROSTRIS	0
1006	2019-06-06	CDL	BIROSTRIS	0
1007	2019-06-07	CDL	BIROSTRIS	0
1008	2019-06-07	MLT	BIROSTRIS	0
1009	2019-06-08	CDL	BIROSTRIS	0
1010	2019-06-08	MLT	BIROSTRIS	0
1011	2019-06-09	MLT	BIROSTRIS	0
1012	2019-06-10	CDL	BIROSTRIS	0
1013	2019-06-11	JMA	BIROSTRIS	0
1014	2019-06-17	VFM	BIROSTRIS	0
1015	2019-06-17	VLS	BIROSTRIS	0
1016	2019-06-18	VFM	BIROSTRIS	0
1017	2019-06-18	VLS	BIROSTRIS	1
1018	2019-06-19	CFM	BIROSTRIS	0
1019	2019-06-19	VFH	BIROSTRIS	1
1020	2019-06-19	VLS	BIROSTRIS	0
1021	2019-06-20	CFM	BIROSTRIS	0
1022	2019-06-20	VFM	BIROSTRIS	0
1023	2019-06-20	VLS	BIROSTRIS	6
1024	2019-06-21	CFM	BIROSTRIS	0
1025	2019-06-21	VFH	BIROSTRIS	2
1026	2019-06-21	VFM	BIROSTRIS	0
1027	2019-06-21	VLS	BIROSTRIS	0
1028	2019-06-22	CFM	BIROSTRIS	0
1029	2019-06-23	VLS	BIROSTRIS	0
1030	2019-06-24	VFH	BIROSTRIS	0
1031	2019-06-26	VFM	BIROSTRIS	0
1032	2019-06-26	VLS	BIROSTRIS	1
1033	2019-06-27	VLS	BIROSTRIS	3
1034	2019-07-03	VFH	BIROSTRIS	1
1035	2019-07-03	VLS	BIROSTRIS	1
1036	2019-07-04	VFM	BIROSTRIS	0
1037	2019-07-04	VLS	BIROSTRIS	1
1038	2019-07-05	VFH	BIROSTRIS	0
1039	2019-07-06	CDL	BIROSTRIS	0
1040	2019-07-07	VLS	BIROSTRIS	0
1041	2019-07-09	VFH	BIROSTRIS	0
1042	2019-07-09	VFM	BIROSTRIS	0
1043	2019-07-10	PAP	BIROSTRIS	0
1044	2019-07-11	PAP	BIROSTRIS	0
1045	2019-07-11	VLS	BIROSTRIS	0
1046	2019-07-16	VLS	BIROSTRIS	0
1047	2019-07-19	VLS	BIROSTRIS	1
1048	2019-07-20	VFH	BIROSTRIS	0
1049	2019-07-22	BHL	BIROSTRIS	0
1050	2019-07-22	VFH	BIROSTRIS	0
1051	2019-07-22	VFM	BIROSTRIS	0
1052	2019-07-24	NBO	BIROSTRIS	0
1053	2019-07-24	PAP	BIROSTRIS	0
1054	2019-07-25	NBO	BIROSTRIS	0
1055	2019-07-25	NFM	BIROSTRIS	0
1056	2019-07-26	NBO	BIROSTRIS	0
1057	2019-07-27	NBO	BIROSTRIS	2
1058	2019-07-29	JMA	BIROSTRIS	0
1059	2019-08-10	VFH	BIROSTRIS	1
1060	2019-08-10	VLS	BIROSTRIS	0
1061	2019-08-14	PAP	BIROSTRIS	0
1062	2019-08-16	MGL	BIROSTRIS	0
1063	2019-08-17	MGL	BIROSTRIS	0
1064	2019-08-19	NFM	BIROSTRIS	0
1065	2019-08-20	NBO	BIROSTRIS	0
1066	2019-08-21	VLS	BIROSTRIS	3
1067	2019-08-22	VFM	BIROSTRIS	0
1068	2019-08-22	VLS	BIROSTRIS	3
1069	2019-08-23	VFH	BIROSTRIS	0
1070	2019-08-27	CFM	BIROSTRIS	0
1071	2019-08-27	VLS	BIROSTRIS	2
1072	2019-08-28	CFM	BIROSTRIS	0
1073	2019-08-28	VLS	BIROSTRIS	1
1074	2019-08-29	CFM	BIROSTRIS	0
1075	2019-08-29	VLS	BIROSTRIS	3
1076	2019-08-30	NBO	BIROSTRIS	0
1077	2019-08-30	VFH	BIROSTRIS	0
1078	2019-09-02	VLS	BIROSTRIS	1
1079	2019-09-03	VFH	BIROSTRIS	0
1080	2019-09-04	VFH	BIROSTRIS	0
1081	2019-09-05	VFH	BIROSTRIS	0
1082	2019-09-05	VLS	BIROSTRIS	2
1083	2019-09-07	BRW	BIROSTRIS	0
1084	2019-09-07	MFM	BIROSTRIS	0
1085	2019-09-07	VLS	BIROSTRIS	1
1086	2019-09-08	BLS	BIROSTRIS	0
1087	2019-09-08	BRW	BIROSTRIS	0
1088	2019-09-08	VFH	BIROSTRIS	0
1089	2019-09-09	BRW	BIROSTRIS	1
1090	2019-09-09	NBO	BIROSTRIS	0
1091	2019-09-10	NBO	BIROSTRIS	0
1092	2019-09-10	NFM	BIROSTRIS	0
1093	2019-09-10	VLS	BIROSTRIS	1
1094	2019-09-11	CFM	BIROSTRIS	0
1095	2019-09-11	NBO	BIROSTRIS	0
1096	2019-09-13	BLS	BIROSTRIS	0
1097	2019-09-14	BLS	BIROSTRIS	0
1098	2019-09-14	BRW	BIROSTRIS	0
1099	2019-09-19	VFM	BIROSTRIS	0
1100	2019-09-19	VLS	BIROSTRIS	5
1101	2019-09-20	VFH	BIROSTRIS	0
1102	2019-09-21	BLS	BIROSTRIS	0
1103	2019-09-23	CFM	BIROSTRIS	0
1104	2019-09-23	NBO	BIROSTRIS	0
1105	2019-09-23	PAP	BIROSTRIS	0
1106	2019-09-24	CFM	BIROSTRIS	0
1107	2019-09-25	CFM	BIROSTRIS	0
1108	2019-09-26	VFH	BIROSTRIS	1
1109	2019-09-29	BRW	BIROSTRIS	0
1110	2019-09-30	TFH	BIROSTRIS	0
1111	2019-10-01	VFH	BIROSTRIS	0
1112	2019-10-02	VFH	BIROSTRIS	0
1113	2019-10-03	VFH	BIROSTRIS	2
1114	2019-10-03	VFM	BIROSTRIS	0
1115	2019-10-03	VLS	BIROSTRIS	0
1116	2019-10-07	PAP	BIROSTRIS	0
1117	2019-10-07	VFH	BIROSTRIS	0
1118	2019-10-07	VFM	BIROSTRIS	0
1119	2019-10-08	PAP	BIROSTRIS	0
1120	2019-10-09	BLS	BIROSTRIS	0
1121	2019-10-09	PAP	BIROSTRIS	0
1122	2019-10-10	VFH	BIROSTRIS	0
1123	2019-10-10	VFM	BIROSTRIS	0
1124	2019-10-10	VLS	BIROSTRIS	2
1125	2019-10-11	PAP	BIROSTRIS	0
1126	2019-10-12	BRW	BIROSTRIS	0
1127	2019-10-12	PAP	BIROSTRIS	0
1128	2019-10-14	PAP	BIROSTRIS	0
1129	2019-10-16	VLS	BIROSTRIS	1
1130	2019-10-17	PAP	BIROSTRIS	0
1131	2019-10-17	TFH	BIROSTRIS	0
1132	2019-10-18	PAP	BIROSTRIS	0
1133	2019-10-18	TFH	BIROSTRIS	0
1134	2019-10-19	PAP	BIROSTRIS	0
1135	2019-10-20	PAP	BIROSTRIS	0
1136	2019-10-20	TFH	BIROSTRIS	0
1137	2019-10-22	PAP	BIROSTRIS	0
1138	2019-10-23	VFM	BIROSTRIS	0
1139	2019-10-23	VLS	BIROSTRIS	1
1140	2019-10-24	VFM	BIROSTRIS	0
1141	2019-10-24	VLS	BIROSTRIS	0
1142	2019-10-25	BRW	BIROSTRIS	0
1143	2019-10-25	NBO	BIROSTRIS	0
1144	2019-10-26	NBO	BIROSTRIS	0
1145	2019-10-27	BRW	BIROSTRIS	0
1146	2019-10-29	NBO	BIROSTRIS	0
1147	2019-10-31	PAP	BIROSTRIS	0
1148	2019-10-31	VFH	BIROSTRIS	0
1149	2019-10-31	VFM	BIROSTRIS	0
1150	2019-10-31	VLS	BIROSTRIS	0
1151	2019-11-01	PAP	BIROSTRIS	0
1152	2019-11-01	VLS	BIROSTRIS	0
1153	2019-11-02	PAP	BIROSTRIS	0
1154	2019-11-03	PAP	BIROSTRIS	0
1155	2019-11-04	VFM	BIROSTRIS	0
1156	2019-11-04	VLS	BIROSTRIS	1
1157	2019-11-05	PAP	BIROSTRIS	0
1158	2019-11-05	VLS	BIROSTRIS	0
1159	2019-11-06	PAP	BIROSTRIS	0
1160	2019-11-06	VFM	BIROSTRIS	0
1161	2019-11-06	VLS	BIROSTRIS	4
1162	2019-11-08	PAP	BIROSTRIS	0
1163	2019-11-09	BLS	BIROSTRIS	0
1164	2019-11-09	PAP	BIROSTRIS	0
1165	2019-11-10	BRW	BIROSTRIS	0
1166	2019-11-11	PAP	BIROSTRIS	0
1167	2019-11-14	JPP	BIROSTRIS	0
1168	2019-11-22	PAP	BIROSTRIS	0
1169	2019-11-22	VLS	BIROSTRIS	0
1170	2019-11-23	BLS	BIROSTRIS	0
1171	2019-11-23	PAP	BIROSTRIS	0
1172	2019-11-24	BRW	BIROSTRIS	0
1173	2019-11-24	PAP	BIROSTRIS	0
1174	2019-11-24	VLS	BIROSTRIS	0
1175	2019-11-27	VFH	BIROSTRIS	0
1176	2019-11-28	VLS	BIROSTRIS	0
1177	2019-11-29	NBO	BIROSTRIS	0
1178	2019-11-30	PAP	BIROSTRIS	0
1179	2019-12-01	PAP	BIROSTRIS	0
1180	2019-12-02	NBO	BIROSTRIS	1
1181	2019-12-03	NBO	BIROSTRIS	0
1182	2019-12-04	VLS	BIROSTRIS	0
1183	2019-12-06	PAP	BIROSTRIS	0
1184	2019-12-07	VFH	BIROSTRIS	0
1185	2019-12-10	PAP	BIROSTRIS	0
1186	2019-12-12	PAP	BIROSTRIS	0
1187	2019-12-12	VFM	BIROSTRIS	0
1188	2019-12-17	KFH	BIROSTRIS	0
1189	2019-12-19	VFM	BIROSTRIS	0
1190	2019-12-19	VLS	BIROSTRIS	0
1191	2019-12-20	VLS	BIROSTRIS	0
1192	2019-12-21	PAP	BIROSTRIS	0
1193	2019-12-22	VLS	BIROSTRIS	0
1194	2019-12-23	PAP	BIROSTRIS	0
1195	2019-12-24	VLS	BIROSTRIS	0
1196	2019-12-28	JMA	BIROSTRIS	0
1197	2019-12-30	PAP	BIROSTRIS	0
1198	2019-12-31	BRW	BIROSTRIS	0
1199	2019-12-31	PAP	BIROSTRIS	0
1200	2020-01-03	VLS	BIROSTRIS	1
1201	2020-01-04	VFH	BIROSTRIS	1
1202	2020-01-04	VFM	BIROSTRIS	0
1203	2020-01-05	PAP	BIROSTRIS	0
1204	2020-01-06	VFH	BIROSTRIS	1
1205	2020-01-06	VFM	BIROSTRIS	0
1206	2020-01-06	VLS	BIROSTRIS	0
1207	2020-01-12	PAP	BIROSTRIS	0
1208	2020-01-17	VLS	BIROSTRIS	0
1209	2020-01-19	PAP	BIROSTRIS	0
1210	2020-01-21	BRW	BIROSTRIS	0
1211	2020-01-21	CFM	BIROSTRIS	0
1212	2020-01-22	BRW	BIROSTRIS	0
1213	2020-01-22	CFM	BIROSTRIS	1
1214	2020-01-23	BRW	BIROSTRIS	0
1215	2020-01-23	CFM	BIROSTRIS	0
1216	2020-01-24	JMA	BIROSTRIS	0
1217	2020-01-24	NBO	BIROSTRIS	0
1218	2020-01-25	BRW	BIROSTRIS	0
1219	2020-01-25	JPP	BIROSTRIS	0
1220	2020-01-25	NBO	BIROSTRIS	0
1221	2020-01-26	BRW	BIROSTRIS	0
1222	2020-01-26	NBO	BIROSTRIS	0
1223	2020-01-27	NBO	BIROSTRIS	0
1224	2020-01-28	NBO	BIROSTRIS	0
1225	2020-01-29	CFM	BIROSTRIS	1
1226	2020-01-30	JPP	BIROSTRIS	0
1227	2020-01-31	JMA	BIROSTRIS	0
1228	2020-02-01	PAP	BIROSTRIS	0
1229	2020-02-01	VFH	BIROSTRIS	0
1230	2020-02-02	PAP	BIROSTRIS	0
1231	2020-02-02	VFH	BIROSTRIS	0
1232	2020-02-02	VLS	BIROSTRIS	0
1233	2020-02-05	VLS	BIROSTRIS	0
1234	2020-02-06	BLS	BIROSTRIS	0
1235	2020-02-06	BRW	BIROSTRIS	1
1236	2020-02-06	JMA	BIROSTRIS	0
1237	2020-02-06	VFM	BIROSTRIS	0
1238	2020-02-06	VLS	BIROSTRIS	0
1239	2020-02-07	BLS	BIROSTRIS	0
1240	2020-02-07	PAP	BIROSTRIS	0
1241	2020-02-08	BLS	BIROSTRIS	0
1242	2020-02-08	PAP	BIROSTRIS	0
1243	2020-02-09	BRW	BIROSTRIS	1
1244	2020-02-09	PAP	BIROSTRIS	0
1245	2020-02-11	BLS	BIROSTRIS	0
1246	2020-02-11	PAP	BIROSTRIS	0
1247	2020-02-11	VLS	BIROSTRIS	0
1248	2020-02-12	BRW	BIROSTRIS	0
1249	2020-02-12	PAP	BIROSTRIS	0
1250	2020-02-12	VFH	BIROSTRIS	0
1251	2020-02-12	VLS	BIROSTRIS	0
1252	2020-02-13	VFM	BIROSTRIS	0
1253	2020-02-13	VLS	BIROSTRIS	0
1254	2020-02-14	PAP	BIROSTRIS	0
1255	2020-02-14	VFH	BIROSTRIS	0
1256	2020-02-15	PAP	BIROSTRIS	0
1257	2020-02-15	VFH	BIROSTRIS	0
1258	2020-02-15	VFM	BIROSTRIS	0
1259	2020-02-16	PAP	BIROSTRIS	0
1260	2020-02-16	VFH	BIROSTRIS	0
1261	2020-02-16	VFM	BIROSTRIS	0
1262	2020-02-17	PAP	BIROSTRIS	0
1263	2020-02-18	PAP	BIROSTRIS	0
1264	2020-02-18	VFH	BIROSTRIS	0
1265	2020-02-19	PAP	BIROSTRIS	0
1266	2020-02-19	VFH	BIROSTRIS	0
1267	2020-02-19	VFM	BIROSTRIS	0
1268	2020-02-20	VFH	BIROSTRIS	0
1269	2020-02-20	VFM	BIROSTRIS	0
1270	2020-02-20	VLS	BIROSTRIS	0
1271	2020-02-21	PAP	BIROSTRIS	0
1272	2020-02-22	PAP	BIROSTRIS	0
1273	2020-02-22	VFH	BIROSTRIS	0
1274	2020-02-22	VFM	BIROSTRIS	0
1275	2020-02-23	PAP	BIROSTRIS	0
1276	2020-02-23	VFH	BIROSTRIS	0
1277	2020-02-24	PAP	BIROSTRIS	0
1278	2020-02-24	VFH	BIROSTRIS	0
1279	2020-02-25	PAP	BIROSTRIS	0
1280	2020-02-28	PAP	BIROSTRIS	0
1281	2020-02-29	VFM	BIROSTRIS	0
1282	2020-03-02	PAP	BIROSTRIS	0
1283	2020-03-03	NBO	BIROSTRIS	1
1284	2020-03-03	PAP	BIROSTRIS	0
1285	2020-03-04	CFM	BIROSTRIS	0
1286	2020-03-04	NBO	BIROSTRIS	1
1287	2020-03-04	VLS	BIROSTRIS	0
1288	2020-03-05	CFM	BIROSTRIS	0
1289	2020-03-05	NBO	BIROSTRIS	1
1290	2020-03-05	VLS	BIROSTRIS	0
1291	2020-03-06	CFM	BIROSTRIS	0
1292	2020-03-06	NBO	BIROSTRIS	0
1293	2020-03-07	CFM	BIROSTRIS	0
1294	2020-03-07	NBO	BIROSTRIS	0
1295	2020-03-09	NBO	BIROSTRIS	0
1296	2020-03-10	BRW	BIROSTRIS	1
1297	2020-03-10	NBO	BIROSTRIS	0
1298	2020-03-10	PAP	BIROSTRIS	0
1299	2020-03-11	NBO	BIROSTRIS	0
1300	2020-03-11	PAP	BIROSTRIS	0
1301	2020-03-13	CDL	BIROSTRIS	0
1302	2010-05-01	NBO	KUHLII	0
1303	2010-11-15	NBO	KUHLII	0
1304	2010-11-16	NBO	KUHLII	0
1305	2010-11-17	NBO	KUHLII	0
1306	2010-11-18	NBO	KUHLII	0
1307	2010-11-19	NBO	KUHLII	0
1308	2011-01-15	MFH	KUHLII	0
1309	2011-01-16	MFH	KUHLII	0
1310	2011-02-11	MFH	KUHLII	0
1311	2011-05-02	NBO	KUHLII	0
1312	2011-05-03	NBO	KUHLII	0
1313	2011-05-04	NBO	KUHLII	0
1314	2011-05-05	NBO	KUHLII	0
1315	2011-05-06	NBO	KUHLII	0
1316	2011-05-09	MFH	KUHLII	0
1317	2011-05-10	MFH	KUHLII	0
1318	2011-05-11	MFH	KUHLII	0
1319	2011-05-12	MFH	KUHLII	0
1320	2011-05-13	MFH	KUHLII	0
1321	2011-05-19	TCO	KUHLII	0
1322	2011-05-20	TCO	KUHLII	0
1323	2011-05-21	TCO	KUHLII	0
1324	2011-05-22	TCO	KUHLII	0
1325	2011-05-23	TCO	KUHLII	0
1326	2011-05-24	NBO	KUHLII	0
1327	2011-05-25	NBO	KUHLII	0
1328	2011-05-26	NBO	KUHLII	0
1329	2011-05-27	NBO	KUHLII	0
1330	2011-05-28	NBO	KUHLII	0
1331	2011-06-02	NBO	KUHLII	0
1332	2011-06-03	NBO	KUHLII	0
1333	2011-06-04	NBO	KUHLII	0
1334	2011-06-06	NBO	KUHLII	0
1335	2011-06-11	NBO	KUHLII	0
1336	2011-06-13	MFH	KUHLII	0
1337	2011-06-14	MFH	KUHLII	0
1338	2011-06-16	MFH	KUHLII	0
1339	2011-06-17	MFH	KUHLII	0
1340	2011-06-18	MFH	KUHLII	0
1341	2011-06-20	NBO	KUHLII	0
1342	2011-06-21	NBO	KUHLII	0
1343	2011-06-22	NBO	KUHLII	0
1344	2011-06-23	NBO	KUHLII	0
1345	2011-06-24	NBO	KUHLII	0
1346	2011-06-25	MFH	KUHLII	0
1347	2011-06-26	MFH	KUHLII	0
1348	2011-06-27	MFH	KUHLII	0
1349	2011-06-28	MFH	KUHLII	0
1350	2011-06-29	MFH	KUHLII	0
1351	2011-07-02	NBO	KUHLII	0
1352	2011-07-04	NBO	KUHLII	0
1353	2011-07-05	NBO	KUHLII	0
1354	2011-07-06	NBO	KUHLII	0
1355	2011-07-07	NBO	KUHLII	0
1356	2011-07-08	MFH	KUHLII	0
1357	2011-07-09	MFH	KUHLII	0
1358	2011-07-10	MFH	KUHLII	0
1359	2011-07-11	MFH	KUHLII	0
1360	2011-07-12	MFH	KUHLII	0
1361	2011-07-13	MFH	KUHLII	0
1362	2011-07-18	NBO	KUHLII	0
1363	2011-07-19	NBO	KUHLII	0
1364	2011-07-20	NBO	KUHLII	0
1365	2011-07-21	NBO	KUHLII	0
1366	2011-07-22	NBO	KUHLII	0
1367	2011-07-23	MFH	KUHLII	0
1368	2011-07-24	MFH	KUHLII	0
1369	2011-07-25	MFH	KUHLII	0
1370	2011-07-26	MFH	KUHLII	0
1371	2011-07-27	MFH	KUHLII	0
1372	2011-08-02	NBO	KUHLII	0
1373	2011-08-03	NBO	KUHLII	1
1374	2011-08-04	NBO	KUHLII	0
1375	2011-08-05	NBO	KUHLII	0
1376	2011-08-06	NBO	KUHLII	0
1377	2011-08-07	MFH	KUHLII	0
1378	2011-08-08	MFH	KUHLII	0
1379	2011-08-09	MFH	KUHLII	0
1380	2011-08-10	MFH	KUHLII	0
1381	2011-08-16	NBO	KUHLII	0
1382	2011-08-17	NBO	KUHLII	0
1383	2011-08-18	NBO	KUHLII	0
1384	2011-08-19	NBO	KUHLII	0
1385	2011-08-20	MFH	KUHLII	0
1386	2011-08-21	MFH	KUHLII	0
1387	2011-08-22	MFH	KUHLII	0
1388	2011-08-23	MFH	KUHLII	0
1389	2011-08-24	MFH	KUHLII	0
1390	2011-08-25	NBO	KUHLII	0
1391	2012-03-02	NBO	KUHLII	0
1392	2012-03-13	NBO	KUHLII	0
1393	2012-03-31	NBO	KUHLII	0
1394	2012-04-02	MFH	KUHLII	0
1395	2012-05-21	MFH	KUHLII	0
1396	2012-05-22	MFH	KUHLII	0
1397	2012-05-23	MFH	KUHLII	0
1398	2012-05-24	MFH	KUHLII	0
1399	2012-05-25	MFH	KUHLII	0
1400	2012-05-28	NBO	KUHLII	0
1401	2012-05-29	NBO	KUHLII	0
1402	2012-05-30	NBO	KUHLII	0
1403	2012-05-31	NBO	KUHLII	0
1404	2012-06-01	NBO	KUHLII	0
1405	2012-06-11	BRW	KUHLII	0
1406	2012-06-12	BRW	KUHLII	0
1407	2012-06-13	BRW	KUHLII	0
1408	2012-06-14	BRW	KUHLII	0
1409	2012-06-18	KLP	KUHLII	0
1410	2012-06-19	KLP	KUHLII	0
1411	2012-06-25	NBO	KUHLII	0
1412	2012-06-26	NBO	KUHLII	0
1413	2012-06-27	NBO	KUHLII	0
1414	2012-07-06	NBO	KUHLII	0
1415	2012-07-07	NBO	KUHLII	0
1416	2012-07-09	BRW	KUHLII	0
1417	2012-07-10	BRW	KUHLII	0
1418	2012-07-11	BRW	KUHLII	0
1419	2012-07-12	BRW	KUHLII	0
1420	2012-07-13	BRW	KUHLII	0
1421	2012-08-06	NBO	KUHLII	0
1422	2012-08-07	NBO	KUHLII	0
1423	2012-08-08	BRW	KUHLII	0
1424	2012-08-09	BRW	KUHLII	0
1425	2012-08-10	BRW	KUHLII	0
1426	2012-08-11	MFH	KUHLII	0
1427	2012-08-12	MFH	KUHLII	0
1428	2012-08-13	MFH	KUHLII	0
1429	2012-08-14	MFH	KUHLII	0
1430	2012-08-15	MFH	KUHLII	0
1431	2012-08-16	MFH	KUHLII	0
1432	2012-08-17	NBO	KUHLII	0
1433	2012-08-22	TCO	KUHLII	0
1434	2012-08-23	TCO	KUHLII	0
1435	2012-08-28	NBO	KUHLII	0
1436	2012-12-14	NBO	KUHLII	0
1437	2012-12-21	NBO	KUHLII	0
1438	2012-12-24	MFH	KUHLII	0
1439	2013-03-08	NBO	KUHLII	0
1440	2013-03-10	MFH	KUHLII	0
1441	2013-03-11	MFH	KUHLII	0
1442	2013-03-12	MFH	KUHLII	0
1443	2013-04-26	NBO	KUHLII	0
1444	2013-04-29	NBO	KUHLII	0
1445	2013-04-30	NBO	KUHLII	0
1446	2013-05-07	NBO	KUHLII	0
1447	2013-05-09	NBO	KUHLII	0
1448	2013-05-13	NBO	KUHLII	0
1449	2013-05-16	NBO	KUHLII	0
1450	2013-05-21	MFH	KUHLII	0
1451	2013-05-22	MFH	KUHLII	0
1452	2013-06-07	NBO	KUHLII	0
1453	2013-06-14	NBO	KUHLII	0
1454	2013-06-25	NBO	KUHLII	0
1455	2013-07-02	MFH	KUHLII	0
1456	2013-07-03	MFH	KUHLII	0
1457	2013-07-04	MFH	KUHLII	0
1458	2013-08-12	NBO	KUHLII	0
1459	2013-08-16	NBO	KUHLII	0
1460	2013-11-26	NBO	KUHLII	0
1461	2013-11-27	NBO	KUHLII	0
1462	2013-11-28	NBO	KUHLII	0
1463	2013-12-04	MFH	KUHLII	0
1464	2014-01-21	NBO	KUHLII	0
1465	2014-01-22	NBO	KUHLII	0
1466	2014-01-29	MFH	KUHLII	0
1467	2014-01-30	MFH	KUHLII	0
1468	2014-02-05	NBO	KUHLII	0
1469	2014-02-17	NBO	KUHLII	0
1470	2014-02-19	MFH	KUHLII	0
1471	2014-02-24	NBO	KUHLII	0
1472	2014-02-25	MFH	KUHLII	0
1473	2014-03-05	MFH	KUHLII	0
1474	2014-03-06	MFH	KUHLII	0
1475	2014-03-07	MFH	KUHLII	0
1476	2014-03-08	MFH	KUHLII	0
1477	2014-03-09	MFH	KUHLII	0
1478	2014-03-10	MFH	KUHLII	0
1479	2014-03-11	DFH	KUHLII	0
1480	2014-03-12	MFH	KUHLII	0
1481	2014-03-14	DFH	KUHLII	0
1482	2014-03-15	DFH	KUHLII	0
1483	2014-03-17	MFH	KUHLII	0
1484	2014-03-18	DFH	KUHLII	0
1485	2014-03-19	DFH	KUHLII	0
1486	2014-03-20	MFH	KUHLII	0
1487	2014-03-21	MFH	KUHLII	0
1488	2014-03-22	DFH	KUHLII	0
1489	2014-03-23	DFH	KUHLII	0
1490	2014-03-24	DFH	KUHLII	0
1491	2014-03-25	MFH	KUHLII	0
1492	2014-03-27	MFH	KUHLII	0
1493	2014-03-28	MFH	KUHLII	0
1494	2014-03-29	MFH	KUHLII	0
1495	2014-03-31	DFH	KUHLII	0
1496	2014-04-01	SFH	KUHLII	0
1497	2014-04-02	MFH	KUHLII	0
1498	2014-04-03	DFH	KUHLII	0
1499	2014-04-04	DFH	KUHLII	0
1500	2014-04-05	SFH	KUHLII	0
1501	2014-04-06	MFH	KUHLII	0
1502	2014-04-07	DFH	KUHLII	0
1503	2014-04-08	DFH	KUHLII	0
1504	2014-04-09	MFH	KUHLII	0
1505	2014-04-10	DFH	KUHLII	0
1506	2014-04-11	DFH	KUHLII	0
1507	2014-04-17	DFH	KUHLII	0
1508	2014-04-18	SFH	KUHLII	0
1509	2014-04-19	DFH	KUHLII	0
1510	2014-04-20	SFH	KUHLII	0
1511	2014-04-21	DFH	KUHLII	0
1512	2014-04-22	DFH	KUHLII	0
1513	2014-04-23	MFH	KUHLII	0
1514	2014-04-24	MFH	KUHLII	0
1515	2014-04-25	SFH	KUHLII	0
1516	2014-04-26	DFH	KUHLII	0
1517	2014-04-26	NBO	KUHLII	0
1518	2014-04-28	DFH	KUHLII	0
1519	2014-04-29	DFH	KUHLII	0
1520	2014-05-01	MFH	KUHLII	0
1521	2014-05-02	MFH	KUHLII	0
1522	2014-05-03	DFH	KUHLII	0
1523	2014-05-04	DFH	KUHLII	0
1524	2014-05-05	DFH	KUHLII	0
1525	2014-05-06	DFH	KUHLII	0
1526	2014-05-07	DFH	KUHLII	0
1527	2014-05-13	DFH	KUHLII	0
1528	2014-05-19	DFH	KUHLII	0
1529	2014-05-20	SFH	KUHLII	0
1530	2014-05-22	DFH	KUHLII	0
1531	2014-05-23	MFH	KUHLII	0
1532	2014-05-24	BRW	KUHLII	0
1533	2014-05-24	DFH	KUHLII	0
1534	2014-05-25	SFH	KUHLII	0
1535	2014-05-26	MFH	KUHLII	0
1536	2014-05-26	NBO	KUHLII	1
1537	2014-05-27	MFH	KUHLII	0
1538	2014-05-28	BRW	KUHLII	0
1539	2014-05-31	BRW	KUHLII	0
1540	2014-06-01	DFH	KUHLII	0
1541	2014-06-02	MFH	KUHLII	0
1542	2014-06-03	MFH	KUHLII	0
1543	2014-06-05	MFH	KUHLII	0
1544	2014-06-06	SFH	KUHLII	0
1545	2014-06-08	MFH	KUHLII	0
1546	2014-06-09	MFH	KUHLII	0
1547	2014-06-10	MFH	KUHLII	0
1548	2014-06-11	DFH	KUHLII	0
1549	2014-06-15	SFH	KUHLII	0
1550	2014-06-16	DFH	KUHLII	0
1551	2014-06-17	MFH	KUHLII	0
1552	2014-06-18	MFH	KUHLII	0
1553	2014-06-19	MFH	KUHLII	0
1554	2014-06-20	MFH	KUHLII	0
1555	2014-06-21	DFH	KUHLII	0
1556	2014-06-22	SFH	KUHLII	0
1557	2014-06-23	SFH	KUHLII	0
1558	2014-06-24	SFH	KUHLII	0
1559	2014-06-25	DFH	KUHLII	0
1560	2014-06-26	DFH	KUHLII	0
1561	2014-06-27	NBO	KUHLII	0
1562	2014-06-27	SFH	KUHLII	0
1563	2014-06-28	MFH	KUHLII	0
1564	2014-07-01	SFH	KUHLII	0
1565	2014-07-02	MFH	KUHLII	0
1566	2014-07-03	MFH	KUHLII	0
1567	2014-07-04	DFH	KUHLII	0
1568	2014-07-05	SFH	KUHLII	0
1569	2014-07-06	MFH	KUHLII	0
1570	2014-07-07	MFH	KUHLII	0
1571	2014-07-07	NBO	KUHLII	0
1572	2014-07-08	DFH	KUHLII	0
1573	2014-07-09	DFH	KUHLII	0
1574	2014-07-10	MFH	KUHLII	0
1575	2014-07-13	MFH	KUHLII	0
1576	2014-07-14	TFH	KUHLII	0
1577	2014-07-15	NBO	KUHLII	0
1578	2014-07-15	TFH	KUHLII	0
1579	2014-07-16	TFH	KUHLII	0
1580	2014-07-17	TFH	KUHLII	0
1581	2014-07-20	MFH	KUHLII	0
1582	2014-07-21	MFH	KUHLII	0
1583	2014-07-22	DFH	KUHLII	0
1584	2014-07-24	SFH	KUHLII	0
1585	2014-07-25	MFH	KUHLII	0
1586	2014-07-26	MFH	KUHLII	0
1587	2014-07-31	MFH	KUHLII	0
1588	2014-08-01	MFH	KUHLII	0
1589	2014-08-02	DFH	KUHLII	0
1590	2014-08-03	DFH	KUHLII	0
1591	2014-08-06	SFH	KUHLII	0
1592	2014-08-07	BRW	KUHLII	0
1593	2014-08-08	GFH	KUHLII	0
1594	2014-08-09	GFH	KUHLII	0
1595	2014-08-10	MFH	KUHLII	0
1596	2014-08-11	GFH	KUHLII	0
1597	2014-08-12	MFH	KUHLII	0
1598	2014-08-13	MFH	KUHLII	0
1599	2014-08-18	BRW	KUHLII	0
1600	2014-08-19	GFH	KUHLII	0
1601	2014-08-19	MFH	KUHLII	0
1602	2014-08-20	MFH	KUHLII	0
1603	2014-08-22	BRW	KUHLII	0
1604	2014-08-23	MFH	KUHLII	0
1605	2014-08-24	BRW	KUHLII	0
1606	2014-09-02	MFH	KUHLII	0
1607	2014-09-03	BRW	KUHLII	0
1608	2014-09-04	GFH	KUHLII	0
1609	2014-09-05	GFH	KUHLII	0
1610	2014-09-06	MFH	KUHLII	0
1611	2014-09-10	MFH	KUHLII	0
1612	2014-09-11	BRW	KUHLII	0
1613	2014-09-12	BRW	KUHLII	0
1614	2014-09-13	BRW	KUHLII	0
1615	2014-09-14	MFH	KUHLII	0
1616	2014-09-17	DFH	KUHLII	0
1617	2014-09-18	DFH	KUHLII	0
1618	2014-09-19	SFH	KUHLII	0
1619	2014-09-20	SFH	KUHLII	0
1620	2014-09-21	SFH	KUHLII	0
1621	2014-09-22	MFH	KUHLII	0
1622	2014-09-23	TFH	KUHLII	0
1623	2014-09-24	TFH	KUHLII	0
1624	2014-09-25	TFH	KUHLII	0
1625	2014-09-29	SFH	KUHLII	0
1626	2014-09-30	SFH	KUHLII	0
1627	2014-10-01	DFH	KUHLII	0
1628	2014-10-05	SFH	KUHLII	0
1629	2014-10-06	MFH	KUHLII	0
1630	2014-10-14	MFH	KUHLII	0
1631	2014-10-15	DFH	KUHLII	0
1632	2014-10-16	SFH	KUHLII	0
1633	2014-10-20	SFH	KUHLII	0
1634	2014-10-21	DFH	KUHLII	0
1635	2014-10-22	MFH	KUHLII	0
1636	2014-10-23	SFH	KUHLII	0
1637	2014-10-25	MFH	KUHLII	0
1638	2014-10-29	SFH	KUHLII	0
1639	2014-10-30	DFH	KUHLII	0
1640	2014-11-01	MFH	KUHLII	0
1641	2014-11-02	MFH	KUHLII	0
1642	2014-11-03	SFH	KUHLII	0
1643	2014-11-04	DFH	KUHLII	0
1644	2014-11-05	DFH	KUHLII	0
1645	2014-11-07	DFH	KUHLII	0
1646	2014-11-08	MFH	KUHLII	0
1647	2014-11-10	DFH	KUHLII	0
1648	2014-11-11	MFH	KUHLII	0
1649	2014-11-12	DFH	KUHLII	0
1650	2014-11-13	SFH	KUHLII	0
1651	2014-11-15	MFH	KUHLII	0
1652	2014-11-17	DFH	KUHLII	0
1653	2014-11-20	DFH	KUHLII	0
1654	2014-11-21	MFH	KUHLII	0
1655	2014-11-22	MFH	KUHLII	0
1656	2014-11-23	SFH	KUHLII	0
1657	2014-11-24	SFH	KUHLII	0
1658	2014-11-25	SFH	KUHLII	0
1659	2014-11-29	MFH	KUHLII	0
1660	2014-12-02	MFH	KUHLII	0
1661	2014-12-03	DFH	KUHLII	0
1662	2014-12-07	SFH	KUHLII	0
1663	2014-12-08	MFH	KUHLII	0
1664	2014-12-09	MFH	KUHLII	0
1665	2014-12-10	MFH	KUHLII	0
1666	2014-12-11	DFH	KUHLII	0
1667	2014-12-12	DFH	KUHLII	0
1668	2014-12-13	DFH	KUHLII	0
1669	2014-12-14	MFH	KUHLII	0
1670	2014-12-17	DFH	KUHLII	0
1671	2014-12-18	DFH	KUHLII	0
1672	2014-12-19	DFH	KUHLII	0
1673	2014-12-20	SFH	KUHLII	0
1674	2014-12-21	SFH	KUHLII	0
1675	2014-12-22	SFH	KUHLII	0
1676	2015-01-02	MFH	KUHLII	0
1677	2015-01-03	MFH	KUHLII	0
1678	2015-01-05	DFH	KUHLII	0
1679	2015-01-06	DFH	KUHLII	0
1680	2015-01-10	DFH	KUHLII	0
1681	2015-01-11	DFH	KUHLII	0
1682	2015-01-12	DFH	KUHLII	0
1683	2015-01-13	SFH	KUHLII	0
1684	2015-01-14	MFH	KUHLII	0
1685	2015-01-16	MFH	KUHLII	0
1686	2015-01-17	SFH	KUHLII	0
1687	2015-01-18	MFH	KUHLII	0
1688	2015-01-19	MFH	KUHLII	0
1689	2015-01-20	DFH	KUHLII	0
1690	2015-01-21	MFH	KUHLII	0
1691	2015-01-22	MFH	KUHLII	0
1692	2015-01-25	DFH	KUHLII	0
1693	2015-01-26	DFH	KUHLII	0
1694	2015-01-27	MFH	KUHLII	0
1695	2015-01-28	MFH	KUHLII	0
1696	2015-01-29	MFH	KUHLII	0
1697	2015-01-30	MFH	KUHLII	0
1698	2015-01-31	MFH	KUHLII	0
1699	2015-02-04	MFH	KUHLII	0
1700	2015-02-05	MFH	KUHLII	0
1701	2015-02-06	MFH	KUHLII	0
1702	2015-02-08	MFH	KUHLII	0
1703	2015-02-09	DFH	KUHLII	0
1704	2015-02-13	DFH	KUHLII	0
1705	2015-02-14	MFH	KUHLII	0
1706	2015-02-17	DFH	KUHLII	0
1707	2015-02-18	MFH	KUHLII	0
1708	2015-02-19	MFH	KUHLII	0
1709	2015-02-23	NBO	KUHLII	0
1710	2015-12-19	PEL	KUHLII	0
1711	2017-03-08	NBO	KUHLII	0
1712	2017-03-10	NBO	KUHLII	0
1713	2017-04-19	NBO	KUHLII	1
1714	2017-05-27	VFH	KUHLII	0
1715	2017-05-28	VFM	KUHLII	0
1716	2017-05-29	VFM	KUHLII	0
1717	2017-05-30	VFM	KUHLII	0
1718	2017-06-03	VFM	KUHLII	0
1719	2017-06-05	VFH	KUHLII	0
1720	2017-08-10	VFH	KUHLII	0
1721	2017-08-12	VFH	KUHLII	0
1722	2017-08-13	VFM	KUHLII	0
1723	2017-08-13	VLS	KUHLII	0
1724	2017-08-14	VLS	KUHLII	0
1725	2017-08-20	VFH	KUHLII	0
1726	2017-08-21	VFM	KUHLII	0
1727	2017-08-21	VLS	KUHLII	0
1728	2017-08-22	VLS	KUHLII	0
1729	2017-08-24	VFM	KUHLII	0
1730	2017-08-24	VLS	KUHLII	0
1731	2017-08-25	VFH	KUHLII	0
1732	2017-08-25	VFM	KUHLII	0
1733	2017-09-05	OFM	KUHLII	0
1734	2017-09-06	VFH	KUHLII	0
1735	2017-09-06	VFM	KUHLII	0
1736	2017-09-07	VFM	KUHLII	0
1737	2017-09-09	VFH	KUHLII	0
1738	2017-09-10	VFH	KUHLII	0
1739	2017-09-10	VFM	KUHLII	0
1740	2017-09-11	VFH	KUHLII	0
1741	2017-09-11	VLS	KUHLII	0
1742	2017-09-12	VFH	KUHLII	0
1743	2017-09-12	VFM	KUHLII	0
1744	2017-09-13	VFH	KUHLII	0
1745	2017-09-13	VFM	KUHLII	0
1746	2017-09-14	VFH	KUHLII	0
1747	2017-09-14	VFM	KUHLII	0
1748	2017-09-15	VFH	KUHLII	0
1749	2017-09-17	VFH	KUHLII	0
1750	2017-09-17	VFM	KUHLII	0
1751	2017-09-18	VFH	KUHLII	0
1752	2017-09-19	VFH	KUHLII	0
1753	2017-09-19	VFM	KUHLII	0
1754	2017-09-20	VFH	KUHLII	0
1755	2017-09-21	VFH	KUHLII	0
1756	2017-09-21	VLS	KUHLII	0
1757	2017-09-22	VFH	KUHLII	0
1758	2017-09-22	VFM	KUHLII	0
1759	2017-09-24	VFH	KUHLII	0
1760	2017-09-27	VFH	KUHLII	0
1761	2017-09-27	VFM	KUHLII	0
1762	2017-09-27	VLS	KUHLII	0
1763	2017-09-28	VFH	KUHLII	0
1764	2017-09-28	VFM	KUHLII	0
1765	2017-09-28	VLS	KUHLII	0
1766	2017-09-29	VFH	KUHLII	0
1767	2017-09-29	VLS	KUHLII	0
1768	2017-10-01	VFH	KUHLII	0
1769	2017-10-01	VFM	KUHLII	0
1770	2017-10-01	VLS	KUHLII	0
1771	2017-10-02	VFH	KUHLII	0
1772	2017-10-04	VFH	KUHLII	0
1773	2017-10-05	VFH	KUHLII	0
1774	2017-10-05	VLS	KUHLII	0
1775	2017-10-12	VFH	KUHLII	0
1776	2017-10-12	VFM	KUHLII	0
1777	2017-10-12	VLS	KUHLII	0
1778	2017-10-13	VFH	KUHLII	0
1779	2017-10-13	VFM	KUHLII	0
1780	2017-10-13	VLS	KUHLII	0
1781	2017-10-14	VFH	KUHLII	0
1782	2017-10-14	VFM	KUHLII	0
1783	2017-10-14	VLS	KUHLII	0
1784	2017-10-15	VFH	KUHLII	0
1785	2017-10-15	VFM	KUHLII	0
1786	2017-10-15	VLS	KUHLII	0
1787	2017-10-16	VFM	KUHLII	0
1788	2017-10-16	VLS	KUHLII	0
1789	2017-10-19	NBO	KUHLII	2
1790	2017-10-19	VFH	KUHLII	0
1791	2017-10-19	VFM	KUHLII	0
1792	2017-10-19	VLS	KUHLII	0
1793	2017-10-20	NBO	KUHLII	0
1794	2017-10-20	VFH	KUHLII	0
1795	2017-10-22	VFH	KUHLII	0
1796	2017-11-01	VFH	KUHLII	0
1797	2017-11-01	VFM	KUHLII	0
1798	2017-11-02	VFH	KUHLII	0
1799	2017-11-03	VLS	KUHLII	0
1800	2017-11-04	VFH	KUHLII	0
1801	2017-11-11	NBO	KUHLII	0
1802	2017-11-17	VFH	KUHLII	0
1803	2017-11-26	JFN	KUHLII	0
1804	2017-11-29	JFN	KUHLII	0
1805	2017-12-06	JFN	KUHLII	0
1806	2017-12-07	JFN	KUHLII	0
1807	2017-12-07	TFH	KUHLII	0
1808	2017-12-08	TFH	KUHLII	0
1809	2017-12-09	JPP	KUHLII	0
1810	2017-12-11	TFH	KUHLII	0
1811	2017-12-12	TFH	KUHLII	0
1812	2017-12-13	JFN	KUHLII	0
1813	2017-12-13	TFH	KUHLII	0
1814	2017-12-14	JFN	KUHLII	0
1815	2017-12-14	TFH	KUHLII	0
1816	2017-12-15	TFH	KUHLII	0
1817	2017-12-16	JPP	KUHLII	0
1818	2017-12-18	TFH	KUHLII	0
1819	2017-12-19	TFH	KUHLII	0
1820	2017-12-20	TFH	KUHLII	0
1821	2017-12-21	TFH	KUHLII	0
1822	2017-12-22	TFH	KUHLII	0
1823	2017-12-23	JPP	KUHLII	0
1824	2017-12-25	TFH	KUHLII	0
1825	2017-12-26	TFH	KUHLII	0
1826	2017-12-27	TFH	KUHLII	0
1827	2017-12-28	TFH	KUHLII	0
1828	2017-12-30	JPP	KUHLII	0
1829	2018-01-04	JFN	KUHLII	0
1830	2018-01-05	TFH	KUHLII	0
1831	2018-01-06	JPP	KUHLII	0
1832	2018-01-07	JFN	KUHLII	0
1833	2018-01-08	NBO	KUHLII	2
1834	2018-01-08	TFH	KUHLII	0
1835	2018-01-09	TFH	KUHLII	0
1836	2018-01-10	TFH	KUHLII	0
1837	2018-01-11	TFH	KUHLII	0
1838	2018-01-16	TFH	KUHLII	0
1839	2018-01-17	JFN	KUHLII	0
1840	2018-01-17	TFH	KUHLII	0
1841	2018-01-18	JFN	KUHLII	0
1842	2018-01-18	TFH	KUHLII	0
1843	2018-01-19	TFH	KUHLII	0
1844	2018-01-24	JFN	KUHLII	0
1845	2018-01-25	JFN	KUHLII	0
1846	2018-01-27	JPP	KUHLII	0
1847	2018-01-31	JFN	KUHLII	0
1848	2018-02-03	VFH	KUHLII	0
1849	2018-02-03	VFM	KUHLII	0
1850	2018-02-03	VLS	KUHLII	0
1851	2018-02-04	VFH	KUHLII	0
1852	2018-02-05	VFH	KUHLII	0
1853	2018-02-06	VFH	KUHLII	0
1854	2018-02-06	VLS	KUHLII	0
1855	2018-02-07	VLS	KUHLII	0
1856	2018-02-09	VLS	KUHLII	0
1857	2018-02-12	VFH	KUHLII	0
1858	2018-02-12	VFM	KUHLII	0
1859	2018-02-13	VFH	KUHLII	0
1860	2018-02-15	VFM	KUHLII	0
1861	2018-02-15	VLS	KUHLII	0
1862	2018-02-16	VLS	KUHLII	0
1863	2018-02-21	JFN	KUHLII	0
1864	2018-02-28	JFN	KUHLII	0
1865	2018-03-01	JFN	KUHLII	0
1866	2018-03-01	JPP	KUHLII	0
1867	2018-03-03	JPP	KUHLII	0
1868	2018-03-03	NBO	KUHLII	0
1869	2018-03-08	KLP	KUHLII	0
1870	2018-03-09	PTM	KUHLII	0
1871	2018-03-10	JPP	KUHLII	0
1872	2018-03-11	JFN	KUHLII	0
1873	2018-03-11	JPP	KUHLII	0
1874	2018-03-12	JFN	KUHLII	0
1875	2018-03-12	JPP	KUHLII	0
1876	2018-03-13	MNR	KUHLII	0
1877	2018-03-14	MUT	KUHLII	0
1878	2018-03-15	MUT	KUHLII	0
1879	2018-03-16	VFH	KUHLII	0
1880	2018-03-16	VLS	KUHLII	0
1881	2018-03-20	VFH	KUHLII	0
1882	2018-03-20	VFM	KUHLII	0
1883	2018-03-21	MUT	KUHLII	0
1884	2018-03-21	VFH	KUHLII	0
1885	2018-03-21	VFM	KUHLII	0
1886	2018-03-22	MUT	KUHLII	0
1887	2018-03-22	VFM	KUHLII	0
1888	2018-03-22	VLS	KUHLII	0
1889	2018-03-26	JPP	KUHLII	0
1890	2018-03-27	JPP	KUHLII	0
1891	2018-03-28	JFN	KUHLII	0
1892	2018-03-29	JFN	KUHLII	0
1893	2018-04-02	JFN	KUHLII	0
1894	2018-04-03	JFN	KUHLII	0
1895	2018-04-03	VLS	KUHLII	0
1896	2018-04-04	JPP	KUHLII	0
1897	2018-04-05	VFM	KUHLII	0
1898	2018-04-05	VLS	KUHLII	0
1899	2018-04-06	JPP	KUHLII	0
1900	2018-04-07	JIS	KUHLII	0
1901	2018-04-08	JPP	KUHLII	0
1902	2018-04-08	VFH	KUHLII	0
1903	2018-04-08	VFM	KUHLII	0
1904	2018-04-09	JFN	KUHLII	0
1905	2018-04-10	JPP	KUHLII	0
1906	2018-04-11	JFN	KUHLII	0
1907	2018-04-11	VLS	KUHLII	0
1908	2018-04-12	JFN	KUHLII	0
1909	2018-04-12	VFH	KUHLII	0
1910	2018-04-12	VLS	KUHLII	0
1911	2018-04-13	VFH	KUHLII	0
1912	2018-04-16	VFH	KUHLII	0
1913	2018-04-16	VLS	KUHLII	0
1914	2018-04-17	VFH	KUHLII	0
1915	2018-04-17	VFM	KUHLII	0
1916	2018-04-17	VLS	KUHLII	0
1917	2018-04-18	JPP	KUHLII	0
1918	2018-04-18	VFM	KUHLII	0
1919	2018-04-18	VLS	KUHLII	0
1920	2018-04-19	JFN	KUHLII	0
1921	2018-04-20	JPP	KUHLII	0
1922	2018-04-20	VFH	KUHLII	0
1923	2018-04-20	VFM	KUHLII	0
1924	2018-04-21	JFN	KUHLII	0
1925	2018-04-22	JFN	KUHLII	0
1926	2018-04-22	VFM	KUHLII	0
1927	2018-04-24	JFN	KUHLII	0
1928	2018-04-24	VFH	KUHLII	0
1929	2018-04-25	JFN	KUHLII	0
1930	2018-04-26	JFN	KUHLII	0
1931	2018-04-28	JPP	KUHLII	0
1932	2018-04-30	JFN	KUHLII	0
1933	2018-05-03	VFH	KUHLII	0
1934	2018-05-03	VFM	KUHLII	0
1935	2018-05-03	VLS	KUHLII	0
1936	2018-05-04	VFH	KUHLII	0
1937	2018-05-05	VFH	KUHLII	0
1938	2018-05-05	VLS	KUHLII	0
1939	2018-05-06	VFH	KUHLII	0
1940	2018-05-06	VFM	KUHLII	0
1941	2018-05-07	VFH	KUHLII	0
1942	2018-05-07	VFM	KUHLII	0
1943	2018-05-07	VLS	KUHLII	0
1944	2018-05-08	VFH	KUHLII	0
1945	2018-05-09	JPP	KUHLII	0
1946	2018-05-09	VFH	KUHLII	0
1947	2018-05-10	JFN	KUHLII	0
1948	2018-05-10	VFH	KUHLII	0
1949	2018-05-12	VFH	KUHLII	0
1950	2018-05-12	VLS	KUHLII	0
1951	2018-05-13	VFH	KUHLII	0
1952	2018-05-13	VFM	KUHLII	0
1953	2018-05-14	NBO	KUHLII	0
1954	2018-05-15	NBO	KUHLII	0
1955	2018-05-16	NBO	KUHLII	0
1956	2018-05-17	NBO	KUHLII	0
1957	2018-05-17	VFH	KUHLII	0
1958	2018-05-17	VFM	KUHLII	0
1959	2018-05-17	VLS	KUHLII	0
1960	2018-05-18	NBO	KUHLII	0
1961	2018-05-19	NBO	KUHLII	0
1962	2018-05-19	VFH	KUHLII	0
1963	2018-05-19	VFM	KUHLII	0
1964	2018-05-19	VLS	KUHLII	0
1965	2018-05-21	BRW	KUHLII	0
1966	2018-05-21	VLS	KUHLII	0
1967	2018-05-22	BRW	KUHLII	0
1968	2018-05-22	VFH	KUHLII	0
1969	2018-05-22	VLS	KUHLII	0
1970	2018-05-23	BRW	KUHLII	0
1971	2018-05-23	VFH	KUHLII	0
1972	2018-05-24	BRW	KUHLII	0
1973	2018-05-24	VFH	KUHLII	0
1974	2018-05-25	BRW	KUHLII	0
1975	2018-05-26	BRW	KUHLII	0
1976	2018-05-30	VFH	KUHLII	0
1977	2018-05-30	VFM	KUHLII	0
1978	2018-06-02	VLS	KUHLII	0
1979	2018-06-03	VLS	KUHLII	0
1980	2018-06-04	VLS	KUHLII	0
1981	2018-06-13	JPP	KUHLII	0
1982	2018-07-04	VFH	KUHLII	0
1983	2018-07-05	JFN	KUHLII	0
1984	2018-07-05	VFH	KUHLII	0
1985	2018-07-05	VLS	KUHLII	0
1986	2018-07-06	JFN	KUHLII	0
1987	2018-07-06	VFH	KUHLII	0
1988	2018-07-07	JFN	KUHLII	0
1989	2018-07-07	VLS	KUHLII	0
1990	2018-07-08	JFN	KUHLII	0
1991	2018-07-08	VFM	KUHLII	0
1992	2018-07-09	JPP	KUHLII	0
1993	2018-07-10	JPP	KUHLII	0
1994	2018-07-11	VLS	KUHLII	0
1995	2018-07-12	VLS	KUHLII	0
1996	2018-07-15	VFH	KUHLII	0
1997	2018-07-15	VFM	KUHLII	0
1998	2018-07-16	VFH	KUHLII	0
1999	2018-07-16	VFM	KUHLII	0
[truncated: 4,506 more rows]
