# Supplementary material for: High bycatch rates of manta and devil rays in the “small-scale” artisanal fisheries of Sri Lanka
Source: PeerJ. 2021 Sep 8;9:e11994. doi: 10.7717/peerj.11994 (PMC8434810; doi:10.7717/peerj.11994)
Supplement: Supplemental Information 2 — HK = Hong Kong; LK = Sri Lanka; T = commercial trade; W = Wild. [file peerj-09-11994-s002.docx]

**Table S1:** Reported trade by Sri Lanka (CITES Trade Database, 2021) of CITES Appendix II listed mobulid rays between 2010 and 2020. *HK = Hong Kong; LK = Sri Lanka; T = commercial trade; W = Wild*.

| **Year** | **Taxon** | **Importer** | **Exporter** | **Exporter reported quantity** | **Unit‡** | **Term** | **Purpose** | **Source** |
| --- | --- | --- | --- | --- | --- | --- | --- | --- |
| 2015 | *Manta* spp. | HK | LK | 1000 | kg | derivatives | T | W |
| 2018 | *Mobula japanica* | HK | LK | 550 | kg | gill plates | T | W |
| 2018 | *Mobula japanica* | HK | LK | 550 |  | gill plates | T | W |
| 2018 | *Mobula japanica* | HK | LK | 225 | kg | live* | T | W |
| 2018 | *Mobula tarapacana* | HK | LK | 450 | kg | gill plates | T | W |
| 2018 | *Mobula tarapacana* | HK | LK | 300 |  | gill plates | T | W |
| 2018 | *Mobula tarapacana* | HK | LK | 200 | kg | live* | T | W |
| 2019 | *Manta birostris* | HK | LK | 750 | kg | gill plates | T | W |
| 2019 | *Mobula* spp. | HK | LK | 1050 | kg | gill plates | T | W |
| 2019 | *Mobula japanica* | HK | LK | 630 | kg | fins† | T | W |
| 2019 | *Mobula japanica* | HK | LK | 5620 | kg | gill plates | T | W |
| 2019 | *Mobula tarapacana* | HK | LK | 250 | kg | fins† | T | W |
| 2019 | *Mobula tarapacana* | HK | LK | 7785 | kg | gill plates | T | W |

*it is unclear if these were live specimens that were traded or if there was an error in the term entered.

†it is highly unlikely that the fins of these species were exported as that has never been documented particularly given that mobulid rays only have a small dorsal fin. It is likely that these were gill plates that were erroneously reported as fins.

‡missing units are due to gaps in reporting. Based on the volumes reported, they are all likely kg
